# Supplementary material for: The ERI-6/7 Helicase Acts at the First Stage of an siRNA Amplification Pathway That Targets Recent Gene Duplications
Source: PLoS Genet. 2011 Nov 10;7(11):e1002369. doi: 10.1371/journal.pgen.1002369 (PMC3213143; doi:10.1371/journal.pgen.1002369)
Supplement: Table S9 — Passenger strand analysis. Position, sequence and abundance of passenger strands and their corresponding 26G siRNAs. (XLSX) [file pgen.1002369.s016.xlsx]

## Sheet: Table
Table S9. 26G siRNA passenger strand reads in wt C. elegans.
26G siRNA Strand				26G siRNA Passenger Strand
Genome Coordinates (WS204)	Strand	Sequence (5'-3')	RPM	Genome Coordinates (WS204)	Strand	Sequence (5'-3')	Length	RPM	Ratio of Passenger strand reads to 26G siRNA Reads
II:2091778..2091803	+	GATGAATCGTCGATAGAAAGACAAAC	47.7883	II:2091780..2091800	-	TGTCTTTCTATCGACGATTCA	21	23.5391	0.492571
II:3306380..3306405	+	GTGGCCTCTCTGCTTTTCCCGTACCG	2.73076	II:3306385..3306402	-	TACGGGAAAAGCAGAGAG	18	17.4222	6.38
II:3291729..3291754	-	GGTTGGTGTAGCGGTATATTACTCAG	28.7276	II:3291732..3291750	+	AGTAATATACCGCTACACC	19	13.4353	0.467681
II:1820367..1820392	+	GTGGCCGTTCGTAGCGTGGTGATAAG	33.5883	II:1820372..1820389	-	ATCACCACGCTACGAACG	18	9.22996	0.274797
II:3596656..3596681	-	GGAAAACATTAAACCGGTACTTATTC	9.50304	II:3596659..3596678	+	TAAGTACCGGTTTAATGTTT	20	9.06612	0.954023
III:3830826..3830851	+	GGTCTTTATATGGCTAGCCGTATTGT	12.1246	III:3830830..3830848	-	ATACGGCTAGCCATATAAA	19	8.41074	0.693694
X:16952375..16952400	+	GATCAAACTTCTTGACGTTTCCAGCC	8.35612	X:16952377..16952397	-	TGGAAACGTCAAGAAGTTTGA	21	6.93613	0.830065
X:1976331..1976356	-	GGTAATGACTGATGTAAGGATTTTCC	32.0045	X:1976334..1976354	+	AAATCCTTACATCAGTCATTA	21	6.55382	0.204778
II:3306211..3306236	+	GGCGGGACCTCCATGTAAACGTACAA	14.1999	II:3306215..3306233	-	TACGTTTACATGGAGGTCC	19	6.36267	0.448077
II:3309245..3309270	+	GGCGGGACCTCCATGTAAACGTACAA	14.1999	II:3309249..3309267	-	TACGTTTACATGGAGGTCC	19	6.36267	0.448077
III:2427571..2427596	-	GGCATTTTCCCATCCAACTGACTGAC	7.04536	III:2427574..2427594	+	AGTCAGTTGGATGGGAAAATG	21	6.33536	0.899225
II:3303207..3303232	+	GCTGGTACGTGTTTAGCTTTTTACCA	13.1076	II:3303209..3303229	-	TAAAAAGCTAAACACGTACCA	21	6.17151	0.470833
II:3303345..3303370	+	GTTTGTTCGTTCTACCGTTTCAAGAA	50.3006	II:3303347..3303367	-	TTGAAACGGTAGAACGAACAA	21	5.0246	0.0998914
V:18720560..18720585	+	GGTTCCTCTTACGGATGTAGAAGAAG	53.5775	V:18720564..18720582	-	CTTCTACATCCGTAAGAGG	19	4.86075	0.0907238
V:19287349..19287374	+	GTTGATAAACAACTTCGACATTTCCA	6.49921	V:19287353..19287371	-	AAATGTCGAAGTTGTTTAT	19	4.80613	0.739496
V:20381382..20381407	-	GTTAGTCGTGTTCCGTTGCATAATCC	35.5545	V:20381385..20381406	+	TTATGCAACGGAACACGACTAA	22	4.47844	0.12596
IV:8598427..8598452	-	GAACCCAATATCACATCATCTTTTTC	8.08305	IV:8598430..8598449	+	AAAGATGATGTGATATTGGG	20	4.25998	0.527027
II:3306326..3306351	+	GGTATTTTGCCAATCTTCCCTCTTAC	12.2338	II:3306330..3306348	-	AGAGGGAAGATTGGCAAAA	19	3.65922	0.299107
II:3373482..3373507	+	GGCTATTAGGACAATAAGAGTGTGAG	108.356	II:3373487..3373504	-	ACACTCTTATTGTCCTAA	18	3.6046	0.0332661
II:3596557..3596582	-	GTTTCTCATTTTTCCTCAATCTCGGC	2.02076	II:3596560..3596579	+	GAGATTGAGGAAAAATGAGA	20	3.54999	1.75676
III:2427548..2427573	-	GACTTCGGCATACTAGCTTTCCATTC	9.83073	III:2427551..2427570	+	TGGAAAGCTAGTATGCCGAA	20	3.49537	0.355556
II:3309446..3309471	+	GGCTTCCAACTCAATCGCCGGGTAAC	5.84382	II:3309447..3309468	-	ACCCGGCGATTGAGTTGGAAGC	22	3.38614	0.579439
V:18722215..18722240	+	GTTGTCATCTGCTCTGAACCGGATAA	18.1322	V:18722217..18722237	-	TCCGGTTCAGAGCAGATGACA	21	3.38614	0.186747
II:2091903..2091928	+	GACTTTTCCAATTTCAACTTCATTCC	16.0022	II:2091906..2091925	-	ATGAAGTTGAAATTGGAAAA	20	3.33153	0.208191
V:19732011..19732036	-	GACTGGCAATCCGGTGTAAAACATAG	1.8023	V:19732014..19732032	+	TGTTTTACACCGGATTGCC	19	3.11306	1.72727
II:13477740..13477765	-	GCTATGCTCCAGGATCATAAAGCGGC	10.5407	II:13477743..13477763	+	GCTTTATGATCCTGGAGCATA	21	3.00383	0.284974
II:13478260..13478285	-	GAAAAGTTTACACCGCTCCATTGTTT	7.75535	II:13478263..13478281	+	CAATGGAGCGGTGTAAACT	19	2.5123	0.323944
V:19287513..19287538	+	GACAGATATTCTAAATGTTCTTTCCC	1.52922	V:19287516..19287535	-	AAAGAACATTTAGAATATCT	20	2.45768	1.60714
II:2681478..2681503	+	GACACTTTCCTCTGAACCAAGTTTTA	11.8515	II:2681481..2681500	-	AACTTGGTTCAGAGGAAAGT	20	2.34845	0.198157
V:18720620..18720645	+	GGTTCCTCGTTTGGATATGTAGAAGA	88.7497	V:18720624..18720642	-	TCTACATATCCAAACGAGG	19	2.29384	0.0258462
IV:8598007..8598032	-	GCCCACATATATCAACTCTTTTCCAT	1.74769	IV:8598010..8598027	+	GAAAAGAGTTGATATATG	18	2.23922	1.28125
III:3830327..3830352	+	GATGAATGAAAATAAATGAATCTCAC	16.2753	III:3830329..3830349	-	AGATTCATTTATTTTCATTCA	21	2.23922	0.137584
V:20384294..20384319	-	GATTCATTGACAAAAAATAAAAAAAT	2.23922	V:20384297..20384315	+	TTTTTATTTTTTGTCAATG	19	2.18461	0.97561
II:13477793..13477818	-	GGCGAGTAACGGCTTGATGTAGTCCG	23.7576	II:13477796..13477814	+	ACTACATCAAGCCGTTACT	19	2.18461	0.091954
II:2094610..2094635	+	GATGAATCGTCGTTAATATAAAGCAA	104.533	II:2094612..2094632	-	CTTTATATTAACGACGATTCA	21	2.18461	0.0208986
II:3303149..3303174	+	GTTTTTTTCACGGTGTTGATATTGTT	9.88535	II:3303153..3303171	-	AATATCAACACCGTGAAAA	19	2.12999	0.21547
II:13478232..13478257	-	GCACTTTTTTCACCAAGAACGAAACC	2.83999	II:13478235..13478253	+	TTCGTTCTTGGTGAAAAAA	19	2.07538	0.730769
III:3830640..3830665	+	GGCTCTCGTTGTTGGGACGTTTTTCT	4.42383	III:3830645..3830662	-	AAAACGTCCCAACAACGA	18	2.07538	0.469136
III:3830850..3830875	+	GTTGAGAAAGTGGCTTGCTAAGTGTT	8.73843	III:3830854..3830872	-	ACTTAGCAAGCCACTTTCT	19	2.07538	0.2375
II:3303271..3303296	+	GATGGAACATCTTTTTTGAATTGTCC	12.5069	II:3303273..3303293	-	CAATTCAAAAAAGATGTTCCA	21	2.07538	0.165939
II:2091727..2091752	+	GTTAACATCCTTCTTCGTCAGTTCAG	24.3038	II:2091732..2091749	-	AACTGACGAAGAAGGATG	18	2.02076	0.0831461
II:13478026..13478051	-	GGCATTTTGCGGATTCTATGATTAGC	36.7014	II:13478029..13478051	+	AATCATAGAATCCGCAAAATGCC	23	2.02076	0.0550595
II:2091615..2091640	+	GCCATTTTCGTCCTGTGCTTGCGATA	70.672	II:2091619..2091637	-	CGCAAGCACAGGACGAAAA	19	1.96615	0.0278207
III:3830505..3830530	+	GGGGTGATTACTAAAAAATCAATAAA	20.2076	III:3830509..3830527	-	ATTGATTTTTTAGTAATCA	19	1.91153	0.0945946
II:3310655..3310680	+	GAATGGTCTCAGAAGGATCTTAATTG	28.1268	II:3310659..3310677	-	TTAAGATCCTTCTGAGACC	19	1.91153	0.0679612
V:18722745..18722770	+	GCGAACTCAGCGATGGTTAGATTTCC	49.9183	V:18722746..18722767	-	AATCTAACCATCGCTGAGTTCG	22	1.91153	0.0382932
II:3291612..3291637	-	GAATCTCCATGTGGAAGGTGAGTTTC	57.7829	II:3291615..3291634	+	ACTCACCTTCCACATGGAGA	20	1.91153	0.0330813
V:18722190..18722215	+	GTGTGGTCTTTGAGTTTCCGATTTCG	48.389	V:18722194..18722212	-	AATCGGAAACTCAAAGACC	19	1.8023	0.037246
V:17069873..17069898	-	GTAAAAAAAATTTATTTCGGAAAAAA	1.69307	V:17069876..17069898	+	TTTCCGAAATAAATTTTTTTTAC	23	1.74769	1.03226
II:3302932..3302957	+	GCTTCAAGTTCTATTGCCGGATATCC	2.07538	II:3302935..3302954	-	TATCCGGCAATAGAACTTGA	20	1.74769	0.842105
IV:3579046..3579071	-	GTCCATATCATCGTGGTCAAGTACAG	4.91537	IV:3579049..3579066	+	TACTTGACCACGATGATA	18	1.69307	0.344444
II:2091669..2091694	+	GTCTGTTTCGATCACGAACGGTTTCC	17.6953	II:2091672..2091691	-	AACCGTTCGTGATCGAAACA	20	1.69307	0.095679
V:19287119..19287144	+	GGTGATTTTGCCTGCGTCTCGTTGGT	21.0268	V:19287124..19287141	-	AACGAGACGCAGGCAAAA	18	1.69307	0.0805195
III:3830667..3830692	+	GTCATCGTCCATCAGTCTGTTGATTC	29.7653	III:3830668..3830689	-	TCAACAGACTGATGGACGATGA	22	1.63846	0.0550459
II:2136706..2136731	+	GCTCAGAAACGGTAGATTATTTTCAA	91.3712	II:2136710..2136728	-	AAAATAATCTACCGTTTCT	19	1.63846	0.0179319
II:1820491..1820516	+	GGGCGTTGTATACGAACTGCTTTTTT	2.56691	II:1820494..1820513	-	AAAGCAGTTCGTATACAACG	20	1.58384	0.617021
X:17245943..17245968	-	GTCCTAATCGTCCCGATCCTTTCATC	4.6969	X:17245946..17245966	+	GAAAGGATCGGGACGATTAGG	21	1.58384	0.337209
II:3596709..3596734	-	GTTTAAAAAAAGACTACATTATATTT	11.7423	II:3596712..3596732	+	TATAATGTAGTCTTTTTTTAA	21	1.58384	0.134884
II:3373345..3373370	+	GATATTTTGTGGCTAATGAGAATGTG	30.9122	II:3373349..3373367	-	ATTCTCATTAGCCACAAAA	19	1.58384	0.0512367
I:2150840..2150865	+	GACGACGTGTTCCAGCATTCTTCGAC	38.9406	I:2150846..2150862	-	GAAGAATGCTGGAACAC	17	1.58384	0.0406732
V:17158753..17158778	+	GTTGGGGCCCTCCATGTTATCGTACG	6.71767	V:17158760..17158775	-	ACGATAACATGGAGGG	16	1.52922	0.227642
V:19287326..19287351	+	GATTCCGGTTTTCCTTCTTCCGTGTT	7.59151	V:19287330..19287348	-	ACGGAAGAAGGAAAACCGG	19	1.47461	0.194245
X:17245976..17246001	-	GAAAATCAATTATTCCAACATTCCAT	10.1584	X:17245979..17245997	+	GAATGTTGGAATAATTGAT	19	1.47461	0.145161
II:3303368..3303393	+	GAACTGTTCCGTCTAAATTCCAGAGT	13.8723	II:3303372..3303390	-	CTGGAATTTAGACGGAACA	19	1.47461	0.106299
III:3831118..3831143	+	GGTTGTGTTCGTCCTCCATACATTGC	16.0569	III:3831122..3831140	-	ATGTATGGAGGACGAACAC	19	1.47461	0.0918367
V:19290910..19290935	+	GTTGATTTACGTGCTCCAATGGTATT	37.4114	V:19290914..19290932	-	ACCATTGGAGCACGTAAAT	19	1.47461	0.0394161
V:17069323..17069348	-	GGATGGCAGCCGATGTGAATGAAGAG	2.29384	V:17069326..17069344	+	TTCATTCACATCGGCTGCC	19	1.41999	0.619048
X:17245821..17245846	-	GCAATATCATCCATTACAATGTACCA	25.8876	X:17245824..17245843	+	TACATTGTAATGGATGATAT	20	1.41999	0.0548523
II:13478283..13478308	-	GAGTGACATCCCTTCTGATCGTGGAA	5.62536	II:13478286..13478307	+	CACGATCAGAAGGGATGTCACT	22	1.36538	0.242718
II:2136762..2136787	+	GTGGTAGCCTAGTAAATTGGTGTGAT	7.37305	II:2136764..2136784	-	ACACCAATTTACTAGGCTACC	21	1.36538	0.185185
V:17073561..17073586	-	GTAAGCAACTTGACCGTGTTGATCCA	17.0945	V:17073564..17073583	+	ATCAACACGGTCAAGTTGCT	20	1.36538	0.0798722
III:2427317..2427342	-	GTCTTGGAAGCCGCAAATCTGGTATT	2.02076	III:2427320..2427338	+	ACCAGATTTGCGGCTTCCA	19	1.31076	0.648649
X:16952273..16952298	+	GGCTCGATTTTTGAACCATTCCGCTG	2.34845	X:16952278..16952295	-	CGGAATGGTTCAAAAATC	18	1.31076	0.55814
III:2427448..2427473	-	GTCCATATTCACGCTACGGTTGATAG	9.77612	III:2427451..2427469	+	TCAACCGTAGCGTGAATAT	19	1.31076	0.134078
V:19290724..19290749	+	GCTCCTCGTTTTGGAAATGGAATCTC	141.071	V:19290727..19290746	-	ATTCCATTTCCAAAACGAGG	20	1.31076	0.00929152
III:3831092..3831117	+	GGTGACATTGCGACATAAAGTTGTCC	7.64612	III:3831094..3831114	-	CAACTTTATGTCGCAATGTCA	21	1.25615	0.164286
II:2503423..2503448	+	GTACCCTGCTTGCCATTTAACTGTTA	15.7838	II:2503426..2503445	-	CAGTTAAATGGCAAGCAGGG	20	1.25615	0.0795848
V:18720942..18720967	+	GAAACGACGTGATGCTTCTTCTTCCT	33.0422	V:18720946..18720964	-	AAGAAGAAGCATCACGTCG	19	1.25615	0.0380165
II:3291704..3291729	-	GTTGCAATTTTCCCGTCGTATCTTTG	44.4021	II:3291707..3291722	+	AGATACGACGGGAAAA	16	1.25615	0.0282903
II:3306693..3306718	+	GCTATCATCTTACTTGGACCTCTCCC	1.31076	II:3306700..3306715	-	AGAGGTCCAAGTAAGA	16	1.20153	0.916667
II:3306183..3306208	+	GCTTCGCGGCAAAAGAAGTTCTCCTT	14.2546	II:3306187..3306205	-	GAGAACTTCTTTTGCCGCG	19	1.20153	0.0842912
II:2681660..2681685	+	GAGAAGTCCCAGTGCCATACTTTGTG	20.3168	II:2681665..2681682	-	AAAGTATGGCACTGGGAC	18	1.20153	0.0591398
II:3310811..3310836	+	GGTTGGTTCTGCGATTAGGAATTTGG	29.2737	II:3310815..3310833	-	AATTCCTAATCGCAGAACC	19	1.20153	0.0410448
III:3830467..3830492	+	GGAAGTAGGGAGTGGGTGTGCTAAAC	1.96615	III:3830470..3830489	-	TAGCACACCCACTCCCTACT	20	1.14692	0.583333
X:1976214..1976239	-	GGCTGTAACCTTGTCAGTTTGGATCC	1.47461	X:1976217..1976236	+	TCCAAACTGACAAGGTTACA	20	1.0923	0.740741
IV:3579466..3579491	-	GGGTGAGACATGGTATCGAGATATGA	4.42383	IV:3579469..3579491	+	TATCTCGATACCATGTCTCACCC	23	1.0923	0.246914
II:3306888..3306913	+	GTGGCCTGCTTCTTTTCGGTTTTGCG	9.39381	II:3306893..3306910	-	AAAACCGAAAAGAAGCAG	18	1.0923	0.116279
II:13478770..13478795	-	GTTATAATGACCTTTATCCATTCTTG	14.8007	II:13478773..13478791	+	GAATGGATAAAGGTCATTA	19	1.0923	0.0738007
IV:8598370..8598395	-	GCAGTGCCACACTTCGTGATATTTAA	34.8445	IV:8598373..8598391	+	AATATCACGAAGTGTGGCA	19	1.0923	0.031348
X:17245869..17245894	-	GAATCCATTCATGCTTATTCAATTGA	43.2006	X:17245872..17245890	+	ATTGAATAAGCATGAATGG	19	1.0923	0.0252845
II:3302931..3302956	+	GGCTTCAAGTTCTATTGCCGGATATC	47.406	II:3302935..3302953	-	ATCCGGCAATAGAACTTGA	19	1.0923	0.0230415
II:1820464..1820489	+	GTTTTGTTGCTCTCTGTTTTTATCTC	58.1105	II:1820467..1820486	-	ATAAAAACAGAGAGCAACAA	20	1.0923	0.018797
I:2149984..2150009	+	GGGGTGTCTTAGTTGCACGTTGTAGC	3.2223	I:2149986..2150006	-	ACAACGTGCAACTAAGACACC	21	1.03769	0.322034
IV:15647198..15647223	+	GAGGACAATGCCGGTAACCTCCAGAG	3.6046	IV:15647202..15647220	-	TGGAGGTTACCGGCATTGT	19	1.03769	0.287879
II:2091880..2091905	+	GATACGATGTATGTTCGAACTTCGAC	5.95305	II:2091886..2091902	-	GAAGTTCGAACATACAT	17	1.03769	0.174312
III:3153315..3153340	-	GACTCGTGACATGGCTACGTATAGTT	6.22613	III:3153318..3153335	+	TATACGTAGCCATGTCAC	18	1.03769	0.166667
X:1975943..1975968	-	GTTTCCAAATACCATCATTTTATCGT	6.60844	X:1975946..1975964	+	ATAAAATGATGGTATTTGG	19	1.03769	0.157025
IV:8597951..8597976	-	GCAATGCCAGACTTCATGGTATTTCA	14.8007	IV:8597954..8597972	+	AATACCATGAAGTCTGGCA	19	1.03769	0.0701107
I:2150183..2150208	+	GGGCCCCATTTGCCTCAAAATTTGAT	19.1699	I:2150187..2150205	-	AAATTTTGAGGCAAATGGG	19	1.03769	0.0541311
II:1820575..1820600	+	GGAGGCCGTTGAAGACAAAATGGGAT	50.6829	II:1820581..1820597	-	CCATTTTGTCTTCAACG	17	1.03769	0.0204741
V:20384210..20384235	-	GAGTAGATATCGTGTATGAGGTTTCA	187.985	V:20384213..20384231	+	AACCTCATACACGATATCT	19	1.03769	0.00552005
II:3314847..3314872	+	GCGGTCCAGCTACCAATTTACTTTAG	3.05845	II:3314850..3314869	-	AAGTAAATTGGTAGCTGGAC	20	0.983073	0.321429
II:3306405..3306430	+	GATTGTCTCTGGTTTCTTTCCTTATT	4.6969	II:3306409..3306427	-	AAGGAAAGAAACCAGAGAC	19	0.983073	0.209302
II:3314800..3314825	+	GAACCTGCTCCGTCTAGAATTAATTC	7.26382	II:3314803..3314822	-	TTAATTCTAGACGGAGCAGG	20	0.983073	0.135338
X:17253839..17253864	-	GAGATTTACCACCCTGTCGTCATCTC	21.4091	X:17253842..17253860	+	ATGACGACAGGGTGGTAAA	19	0.983073	0.0459184
II:3373192..3373217	+	GATGGTTGATGGCAATACCGCATTAA	99.4542	II:3373196..3373214	-	ATGCGGTATTGCCATCAAC	19	0.983073	0.00988468
V:17539120..17539145	+	GGTTATTTATCAAATTGTCTCATTCA	12.2884	V:17539125..17539142	-	ATGAGACAATTTGATAAA	18	0.928458	0.0755556
II:3303321..3303346	+	GCATATCCACTCTTATTTTGTTTCGT	13.1623	II:3303326..3303343	-	AAACAAAATAAGAGTGGA	18	0.928458	0.0705394
X:16952194..16952219	+	GATTTTCCAATCCCACTTCGTAATTT	15.5653	X:16952194..16952216	-	TTACGAAGTGGGATTGGAAAATC	23	0.928458	0.0596491
II:2503455..2503480	+	GATTTTTCTTTCTTCTGGATTTTTAT	36.2099	II:2503460..2503477	-	AAAATCCAGAAGAAAGAA	18	0.928458	0.025641
II:3309217..3309242	+	GCTTCGCGGCAGAAGAAGTTCTCCCT	1.69307	II:3309223..3309239	-	GAGAACTTCTTCTGCCG	17	0.873843	0.516129
III:2427373..2427398	-	GGTCCAATGCACTTATCCTACACTTG	1.85692	III:2427376..2427393	+	GTGTAGGATAAGTGCATT	18	0.873843	0.470588
III:2295327..2295352	-	GAATAAAGTTTGCTGAAAGTCTAGAA	4.58767	III:2295330..2295350	+	TAGACTTTCAGCAAACTTTAT	21	0.873843	0.190476
II:3314548..3314573	+	GTAGACCCAGGTGTAGCGGTATTGGC	5.62536	II:3314549..3314570	-	AATACCGCTACACCTGGGTCTA	22	0.873843	0.15534
IV:8598039..8598064	-	GTTCCCAATATCAATCATACTTTTCA	43.3644	IV:8598042..8598060	+	AAAGTATGATTGATATTGG	19	0.873843	0.0201511
IV:17217124..17217149	-	GCCTCCAAGATCGTATTCTCGAATGC	48.7167	IV:17217127..17217145	+	TTCGAGAATACGATCTTGG	19	0.873843	0.0179372
IV:14937472..14937497	-	GTAGACAACGTTTCTTATAAAAATCC	1.20153	IV:14937475..14937495	+	TTTTTATAAGAAACGTTGTCT	21	0.819228	0.681818
IV:14936934..14936959	+	GTAGACAACGTTTCTTATAAAAATCC	1.20153	IV:14936936..14936956	-	TTTTTATAAGAAACGTTGTCT	21	0.819228	0.681818
V:19287107..19287132	+	GGTGTTTCCACCGGTGATTTTGCCTG	1.47461	V:19287111..19287129	-	GCAAAATCACCGGTGGAAA	19	0.819228	0.555556
IV:14773742..14773767	+	GCGTCTCTGTGTGCTGGTAAGTGGAG	1.69307	IV:14773743..14773764	-	CACTTACCAGCACACAGAGACG	22	0.819228	0.483871
II:2501972..2501997	+	GGAACTTTTAAACTAGGTAGGTTAAA	2.07538	II:2501972..2501994	-	AACCTACCTAGTTTAAAAGTTCC	23	0.819228	0.394737
V:17073953..17073978	-	GTAAAAAATTTATTTGGGAAACAAAA	2.23922	V:17073956..17073978	+	TGTTTCCCAAATAAATTTTTTAC	23	0.819228	0.365854
V:17073591..17073616	-	GTTCATAGTCACTCCCTTTGCCTTAA	2.56691	V:17073594..17073614	+	AGGCAAAGGGAGTGACTATGA	21	0.819228	0.319149
V:17069770..17069795	-	GTGTCGACAACTAATTCCCGAATCTC	3.71383	V:17069773..17069794	+	ATTCGGGAATTAGTTGTCGACA	22	0.819228	0.220588
V:17069399..17069424	-	GAGGGGATAAGAGCTCGTCCGATGGC	3.93229	V:17069402..17069420	+	ATCGGACGAGCTCTTATCC	19	0.819228	0.208333
X:17245845..17245870	-	GATGTTCTACACTGTTAGAACTGCGC	4.6969	X:17245848..17245868	+	CAGTTCTAACAGTGTAGAACA	21	0.819228	0.174419
V:17073407..17073432	-	GTTCATCCCGATCCATCATCCCGTTC	6.38997	V:17073410..17073429	+	CGGGATGATGGATCGGGATG	20	0.819228	0.128205
V:19290854..19290879	+	GGCTTTCCGTTGTCCGTGATGCTATA	8.02843	V:19290857..19290876	-	AGCATCACGGACAACGGAAA	20	0.819228	0.102041
III:2427631..2427656	-	GCCATTTCGGTCGACTACTCTGATTT	11.5784	III:2427634..2427652	+	TCAGAGTAGTCGACCGAAA	19	0.819228	0.0707547
II:3310599..3310624	+	GCGTTGTTGCATGACTCTTGGTGTTG	23.1022	II:3310603..3310621	-	CACCAAGAGTCATGCAACA	19	0.819228	0.035461
III:3831119..3831144	+	GTTGTGTTCGTCCTCCATACATTGCC	1.20153	III:3831121..3831141	-	AATGTATGGAGGACGAACACA	21	0.764612	0.636364
III:3830614..3830639	+	GGGTGAGGTGTTGGTGCTGATGGCAT	1.36538	III:3830614..3830636	-	CCATCAGCACCAACACCTCACCC	23	0.764612	0.56
II:2136785..2136810	+	GATGCTATCGCTTAGCGGTGGTAGTC	1.74769	II:2136787..2136807	-	TACCACCGCTAAGCGATAGCA	21	0.764612	0.4375
X:16902422..16902447	+	GGTTTACTGTTCTCGGCTTCATTAAC	2.18461	X:16902422..16902444	-	AATGAAGCCGAGAACAGTAAACC	23	0.764612	0.35
II:13473809..13473834	-	GAGTTATTGCAAAACTAAGCTATTTC	3.16768	II:13473812..13473831	+	ATAGCTTAGTTTTGCAATAA	20	0.764612	0.241379
IV:3579292..3579317	-	GGGTGACATGGAGATTAGATAACAAA	5.13383	IV:3579295..3579316	+	GTTATCTAATCTCCATGTCACC	22	0.764612	0.148936
III:3830749..3830774	+	GCGATTCTTTGGATCTTTTCAGCCCG	7.48228	III:3830754..3830771	-	GCTGAAAAGATCCAAAGA	18	0.764612	0.10219
III:2427291..2427316	-	GTCCTCGCAATCATTAGATACAAGAC	8.08305	III:2427294..2427316	+	TTGTATCTAATGATTGCGAGGAC	23	0.764612	0.0945946
IV:17220497..17220522	-	GATTGAACATACACCAAATCCTAGGT	12.7799	IV:17220500..17220518	+	TAGGATTTGGTGTATGTTC	19	0.764612	0.0598291
II:2094887..2094912	+	GGAACAGATATGGTGACTTTTGTTGA	14.7461	II:2094892..2094909	-	ACAAAAGTCACCATATCT	18	0.764612	0.0518519
II:13478721..13478746	-	GGAAAGAGTCCAGGTATCAAACAGGG	14.8553	II:13478724..13478742	+	TGTTTGATACCTGGACTCT	19	0.764612	0.0514706
II:1820519..1820544	+	GACCATTTCGTCCAGAGTTTTTGGGT	131.896	II:1820524..1820541	-	CAAAAACTCTGGACGAAA	18	0.764612	0.0057971
V:17073802..17073827	-	GATCAACGCTAGCTGTGTTCCTTTTT	1.14692	V:17073805..17073825	+	AAGGAACACAGCTAGCGTTGA	21	0.709997	0.619048
X:17254177..17254202	-	GGGGAATTCGAGAATGATAGAAGGGA	1.36538	X:17254180..17254202	+	CTTCTATCATTCTCGAATTCCCC	23	0.709997	0.52
II:3310741..3310766	+	GGACATCATGCATTTTGTAGTTCTTC	1.36538	II:3310746..3310763	-	GAACTACAAAATGCATGA	18	0.709997	0.52
V:17069829..17069854	-	GGCCAGTTTAGTTCCATTAGCCAAAA	5.24306	V:17069832..17069852	+	TGGCTAATGGAACTAAACTGG	21	0.709997	0.135417
II:2136519..2136544	+	GATATTTATTGGAATATTTAAAACAA	5.29767	II:2136523..2136541	-	TTTTAAATATTCCAATAAA	19	0.709997	0.134021
IV:17217148..17217173	-	GTTATCGCTATCACTCCGAAAGGCGC	5.4069	IV:17217151..17217172	+	CCTTTCGGAGTGATAGCGATAA	22	0.709997	0.131313
III:3831031..3831056	+	GGCGAATTTACCCCAAGTGGAATTCA	9.99458	III:3831035..3831053	-	ATTCCACTTGGGGTAAATT	19	0.709997	0.0710383
III:2426553..2426578	-	GTGTTGGGAACCTCCATATTATAGGC	10.8684	III:2426556..2426573	+	TATAATATGGAGGTTCCC	18	0.709997	0.0653266
II:3310784..3310809	+	GTATGTTCCATATAGTTTCTGCTTTT	12.0153	II:3310787..3310806	-	AGCAGAAACTATATGGAACA	20	0.709997	0.0590909
II:2094733..2094758	+	GACAATGTATCCTAGGAACTTGATCT	17.5315	II:2094736..2094755	-	TCAAGTTCCTAGGATACATT	20	0.709997	0.0404984
V:19287142..19287167	+	GGTGAAATGGAATAGTCTTAGTTTCG	26.1061	V:19287147..19287164	-	AACTAAGACTATTCCATT	18	0.709997	0.0271967
II:2681506..2681531	+	GTATCCCTCCTCGATGGCAAGGTTGA	32.7691	II:2681510..2681528	-	ACCTTGCCATCGAGGAGGG	19	0.709997	0.0216667
V:20381944..20381969	-	GCATTGATTGTGTCGGAAAAAGAAAA	63.7905	V:20381947..20381969	+	TCTTTTTCCGACACAATCAATGC	23	0.709997	0.0111301
X:1779990..1780015	-	GTAAAGGCGACGGGCAATGATAAGCC	1.01038	X:1779993..1780014	+	TTATCATTGCCCGTCGCCTTTA	22	0.655382	0.648649
X:8144437..8144462	-	GTAAAGGCGACGGGCAATGATAAGCC	1.01038	X:8144440..8144461	+	TTATCATTGCCCGTCGCCTTTA	22	0.655382	0.648649
X:1780163..1780188	-	GTGAAGTGTACTCGCGTATTGCGAAT	1.8023	X:1780166..1780187	+	CGCAATACGCGAGTACACTTCA	22	0.655382	0.363636
V:17539150..17539175	+	GTCTTGGAACCCGCAAATCTGGAACT	2.56691	V:17539155..17539172	-	TCCAGATTTGCGGGTTCC	18	0.655382	0.255319
II:2136659..2136684	+	GTTTGGGTTTCCTTCTATACTTGCAA	4.42383	II:2136663..2136681	-	CAAGTATAGAAGGAAACCC	19	0.655382	0.148148
III:2427605..2427630	-	GACAAAGTGACACTTCCTATCTTCTA	7.31843	III:2427608..2427626	+	AAGATAGGAAGTGTCACTT	19	0.655382	0.0895522
II:2681634..2681659	+	GAAGAAACCTCCACGGAACCATTTCT	8.08305	II:2681636..2681656	-	AATGGTTCCGTGGAGGTTTCT	21	0.655382	0.0810811
X:17245893..17245918	-	GCCTTGTCGATCCATCCATCACACGA	9.17535	X:17245896..17245918	+	TGTGATGGATGGATCGACAAGGC	23	0.655382	0.0714286
II:3597667..3597692	-	GAGGCATACCGGACAACTCATTGCTT	10.923	II:3597670..3597688	+	CAATGAGTTGTCCGGTATG	19	0.655382	0.06
IV:14937495..14937520	-	GTTCGCTTTAAAGTGCATCCATGGTA	12.1792	IV:14937498..14937517	+	CATGGATGCACTTTAAAGCG	20	0.655382	0.0538117
IV:14936911..14936936	+	GTTCGCTTTAAAGTGCATCCATGGTA	12.1792	IV:14936914..14936933	-	CATGGATGCACTTTAAAGCG	20	0.655382	0.0538117
I:2150229..2150254	+	GTACCCCATTGCCGAATGTTTGAATC	22.3922	I:2150233..2150251	-	TCAAACATTCGGCAATGGG	19	0.655382	0.0292683
IV:3578920..3578945	-	GGCATTGATCTTGGTTGCAGGTTCAG	2.83999	IV:3578923..3578941	+	AACCTGCAACCAAGATCAA	19	0.628074	0.221154
I:13411978..13412003	+	GGCATTGATCTTGGTTGCAGGTTCAG	2.83999	I:13411982..13412000	-	AACCTGCAACCAAGATCAA	19	0.628074	0.221154
III:2427701..2427726	-	GAGTATCATAACAGTTTATTCTCGGA	1.03769	III:2427704..2427721	+	GAGAATAAACTGTTATGA	18	0.600767	0.578947
I:13411850..13411875	+	GAATGACTGCATCCATGCAAGCATAG	1.25615	I:13411853..13411872	-	TGCTTGCATGGATGCAGTCA	20	0.600767	0.478261
II:3304101..3304126	+	GTGTATCATAGAAAAAAAAGCAAACA	1.31076	II:3304101..3304123	-	TTGCTTTTTTTTCTATGATACAC	23	0.600767	0.458333
I:13412141..13412166	+	GGGTATCAATGTCGCAGAACGTCAAC	1.74769	I:13412141..13412163	-	GACGTTCTGCGACATTGATACCC	23	0.600767	0.34375
IV:15647223..15647248	+	GCCAATTGTTAAGCGGATTCCAACGC	1.85692	IV:15647228..15647245	-	TTGGAATCCGCTTAACAA	18	0.600767	0.323529
IV:17220548..17220573	-	GGGTTTCTAGGTGCAACAAAACATTT	2.78537	IV:17220551..17220573	+	TGTTTTGTTGCACCTAGAAACCC	23	0.600767	0.215686
III:2427423..2427448	-	GTTGTTCCTTTGCTGATCTGGCATGT	2.94922	III:2427426..2427442	+	TGCCAGATCAGCAAAGG	17	0.600767	0.203704
I:13409997..13410022	+	GGAATGGTTGGATTAGAAGGTTGGAC	3.76845	I:13409997..13410019	-	CAACCTTCTAATCCAACCATTCC	23	0.600767	0.15942
IV:3579166..3579191	-	GCTTCAATACCGCATCATACTTCAAT	4.64229	IV:3579169..3579186	+	GAAGTATGATGCGGTATT	18	0.600767	0.129412
II:3310680..3310705	+	GTTTGGTTCGCGCGCTGAACTTGTCC	5.24306	II:3310683..3310702	-	CAAGTTCAGCGCGCGAACCA	20	0.600767	0.114583
V:17073744..17073769	-	GTGGATGTGTTGTGTAGGCGGCTAAT	6.60844	V:17073747..17073767	+	AGCCGCCTACACAACACATCC	21	0.600767	0.0909091
V:20381971..20381996	-	GGTTATTCTTTCTTTATTATTCAAAA	18.023	V:20381974..20381991	+	TGAATAATAAAGAAAGAA	18	0.600767	0.0333333
IV:8598629..8598654	-	GTATTTAAAAAATGTCTTTGATATGG	19.4976	IV:8598632..8598650	+	TATCAAAGACATTTTTTAA	19	0.600767	0.0308123
II:1820340..1820365	+	GAAGTGCAATACAACAGATTTTTTCT	19.7161	II:1820342..1820362	-	AAAAATCTGTTGTATTGCACT	21	0.600767	0.0304709
V:17073827..17073852	-	GAGCCGTTGTGTGGGGTCGCATAGAG	20.4261	V:17073830..17073851	+	TATGCGACCCCACACAACGGCT	22	0.600767	0.0294118
II:3373730..3373755	+	GAAGTTGCTCCAAATTGTATGTTGTG	20.8084	II:3373735..3373752	-	AACATACAATTTGGAGCA	18	0.600767	0.0288714
II:3306650..3306675	+	GAACCCAATCGACTCGAGAATTGCTT	22.8291	II:3306653..3306672	-	CAATTCTCGAGTCGATTGGG	20	0.600767	0.0263158
X:17253726..17253751	-	GATGTTTTTCTCTTTGCATGATGATC	28.4545	X:17253729..17253749	+	CATCATGCAAAGAGAAAAACA	21	0.600767	0.0211132
V:18721020..18721045	+	GACTTCTTGAATCCGAGCAAAGGTTA	35.5545	V:18721024..18721042	-	CCTTTGCTCGGATTCAAGA	19	0.600767	0.0168971
II:2136563..2136588	+	GGGACCTCCATGTCGTAGGAATGCTC	61.9882	II:2136564..2136585	-	CATTCCTACGACATGGAGGTCC	22	0.600767	0.00969163
II:13478153..13478178	-	GTGCTGTTTCTTGATAGTACATATGA	1.0923	II:13478156..13478174	+	TATGTACTATCAAGAAACA	19	0.546152	0.5
III:3830391..3830416	+	GCCTCTAACCAGTCAGAGAAAAAAAA	1.41999	III:3830394..3830413	-	TTTTTCTCTGACTGGTTAGA	20	0.546152	0.384615
X:16951988..16952013	+	GAAAAATAAGAATACAGAAAAAATGG	1.85692	X:16951989..16952010	-	TTTTTTCTGTATTCTTATTTTT	22	0.546152	0.294118
X:1958763..1958788	+	GGCTTCATCGTCCGATATTGGCTCGC	2.56691	X:1958763..1958785	-	AGCCAATATCGGACGATGAAGCC	23	0.546152	0.212766
II:13478310..13478335	-	GCGTCATCCCACATTTTCAATATCCT	2.73076	II:13478313..13478332	+	ATATTGAAAATGTGGGATGA	20	0.546152	0.2
V:17069775..17069800	-	GTGTTGTGTCGACAACTAATTCCCGA	6.00767	V:17069778..17069795	+	GGAATTAGTTGTCGACAC	18	0.546152	0.0909091
II:13473782..13473807	-	GCTTTTGAGTGTATGAAGCCAATGAC	9.55765	II:13473785..13473805	+	ATTGGCTTCATACACTCAAAA	21	0.546152	0.0571429
I:2149933..2149958	+	GATGGGCGATTTCGCTTGTGGTTCAT	9.61227	I:2149936..2149955	-	AACCACAAGCGAAATCGCCC	20	0.546152	0.0568182
II:3596680..3596705	-	GATAGTAAACAACATTACAAAACAGG	9.7215	II:3596683..3596700	+	GTTTTGTAATGTTGTTTA	18	0.546152	0.0561798
II:2681448..2681473	+	GAGAACGGTAGAACTTTCAAAATATC	12.7253	II:2681452..2681470	-	ATTTTGAAAGTTCTACCGT	19	0.546152	0.0429185
II:2681530..2681555	+	GAGACTCAAATGACCGTATGGAGTGT	317.096	II:2681534..2681552	-	CTCCATACGGTCATTTGAG	19	0.546152	0.00172236
III:2427214..2427239	-	GTCTACATTCATAGCCATCCATGTCC	1.36538	III:2427217..2427234	+	CATGGATGGCTATGAATG	18	0.491537	0.36
II:3596605..3596630	-	GTGGCCACCACAGCTGACGATACTAG	1.47461	II:3596608..3596626	+	GTATCGTCAGCTGTGGTGG	19	0.491537	0.333333
V:17158701..17158726	+	GAGGAGGTCAGTCCTTTTTGATATTA	1.47461	V:17158705..17158723	-	TATCAAAAAGGACTGACCT	19	0.491537	0.333333
II:3373248..3373273	+	GATTGGTCTTTACAAAAAAGGGTGCA	1.91153	II:3373251..3373270	-	ACCCTTTTTTGTAAAGACCA	20	0.491537	0.257143
V:19287529..19287554	+	GTTCTTTCCCTTTAATAATCTTTTCC	2.8946	V:19287531..19287551	-	AAAGATTATTAAAGGGAAAGA	21	0.491537	0.169811
II:3291679..3291704	-	GTCGGTGGAACCTCCATGTTAACATA	3.38614	II:3291682..3291698	+	GTTAACATGGAGGTTCC	17	0.491537	0.145161
III:2295197..2295222	-	GTTTTCAGCACTTAAGCATCAAAATA	3.82306	III:2295200..2295219	+	TTTGATGCTTAAGTGCTGAA	20	0.491537	0.128571
V:19290959..19290984	+	GTCCAGGAAACCGAGCATTGGTCTCA	3.98691	V:19290964..19290981	-	GACCAATGCTCGGTTTCC	18	0.491537	0.123288
V:20381918..20381943	-	GAGATTGAAAACCAATAAATTAAAGA	6.28074	V:20381921..20381938	+	TTAATTTATTGGTTTTCA	18	0.491537	0.0782609
II:13478075..13478100	-	GATCAATGTCAAATTGAAAGCTTTCG	6.55382	II:13478078..13478096	+	AAGCTTTCAATTTGACATT	19	0.491537	0.075
II:13478804..13478829	-	GAAAATTTATTAGTTGAAAATTATTA	7.37305	II:13478807..13478826	+	TAATTTTCAACTAATAAATT	20	0.491537	0.0666667
II:3596580..3596605	-	GCGTTACATTCTCCTCAGTTGCTGTT	7.9192	II:3596583..3596602	+	AGCAACTGAGGAGAATGTAA	20	0.491537	0.062069
IV:15649836..15649861	+	GATTAATACGAGTAATTACCAAAGAA	8.19228	IV:15649838..15649858	-	TTTGGTAATTACTCGTATTAA	21	0.491537	0.06
II:3373542..3373567	+	GTTATTTGGTTATCATGAATATAAGG	8.90227	II:3373546..3373564	-	TATATTCATGATAACCAAA	19	0.491537	0.0552147
V:20381837..20381862	-	GAGAGTATCTTGCCGCAAAAATATCA	9.83073	V:20381840..20381859	+	TATTTTTGCGGCAAGATACT	20	0.491537	0.05
V:19732121..19732146	-	GTTTCCTCAATCACGGCGCTAATCTC	11.7969	V:19732124..19732145	+	ATTAGCGCCGTGATTGAGGAAA	22	0.491537	0.0416667
IV:17217182..17217207	-	GAAACATCTCCAGATCATGTCTGTCC	28.3453	IV:17217185..17217206	+	CAGACATGATCTGGAGATGTTT	22	0.491537	0.017341
II:3306731..3306756	+	GTCTTCAAATGTTGCTTGGATAATAA	46.6414	II:3306735..3306753	-	TTATCCAAGCAACATTTGA	19	0.464229	0.00995316
V:20381810..20381835	-	GGCACCTGGTCCGTCCATAAACAATA	2.23922	V:20381813..20381831	+	TGTTTATGGACGGACCAGG	19	0.436921	0.195122
V:18711696..18711721	-	GTGAAAATCAGACACCAAAAATACAA	2.45768	V:18711699..18711718	+	TATTTTTGGTGTCTGATTTT	20	0.436921	0.177778
IV:15650266..15650291	+	GGTATCGGTCAAGTGCATTTCATATT	2.83999	IV:15650269..15650288	-	ATGAAATGCACTTGACCGAT	20	0.436921	0.153846
IV:3579358..3579383	-	GGCATTAGTTTATATGGCTTTTTATA	2.83999	IV:3579361..3579380	+	AAAAAGCCATATAAACTAAT	20	0.436921	0.153846
IV:4071357..4071382	-	GTCCTTTGGAATTCCCAGTCGAAAAA	3.65922	IV:4071360..4071379	+	TTCGACTGGGAATTCCAAAG	20	0.436921	0.119403
V:17073767..17073792	-	GGACGATTCGGTGTCAACGTACAGTG	6.99074	V:17073770..17073789	+	TGTACGTTGACACCGAATCG	20	0.436921	0.0625
II:3303415..3303440	+	GAAATACCCTGTGTTGACTCTGTTTT	8.51997	II:3303419..3303437	-	ACAGAGTCAACACAGGGTA	19	0.436921	0.0512821
IV:8597976..8598001	-	GTTTATATTGAGATTTGATGTTTCAG	10.923	IV:8597979..8597996	+	AAACATCAAATCTCAATA	18	0.436921	0.04
V:18723204..18723229	+	GTTCCTCCGTTGGATATGTAGAAGAA	11.3053	V:18723204..18723226	-	TTCTACATATCCAACGGAGGAAC	23	0.436921	0.0386473
V:17073584..17073609	-	GTCACTCCCTTTGCCTTAACAGAGTA	12.0153	V:17073587..17073608	+	TCTGTTAAGGCAAAGGGAGTGA	22	0.436921	0.0363636
X:1976357..1976382	-	GTTGAGATCTTGGTTGAGATGATATC	21.0815	X:1976360..1976380	+	ATCATCTCAACCAAGATCTCA	21	0.436921	0.0207254
II:3310835..3310860	+	GGTGTCGGTTGCCTCGGTAAAACTTG	25.5599	II:3310841..3310857	-	GTTTTACCGAGGCAACC	17	0.436921	0.017094
II:3309332..3309357	+	GTGAAGGACAATCTGGTATTTTGCCA	41.6714	II:3309336..3309354	-	CAAAATACCAGATTGTCCT	19	0.436921	0.0104849
II:2094637..2094662	+	GCCAATGAATTTTCGTACATCCGTTA	41.8898	II:2094642..2094659	-	CGGATGTACGAAAATTCA	18	0.436921	0.0104302
II:13478698..13478723	-	GGGAATCGTTATGACTCATAATTGCA	133.534	II:13478701..13478723	+	AATTATGAGTCATAACGATTCCC	23	0.436921	0.00327198
I:2150002..2150027	+	GTTGTAGCGTCTGCGGAAGTGGTCTT	1.14692	I:2150008..2150024	-	ACCACTTCCGCAGACGC	17	0.382306	0.333333
III:2233775..2233800	-	GTCCGTTGCAACGGAAATTCAAATTC	1.14692	III:2233778..2233797	+	TTTGAATTTCCGTTGCAACG	20	0.382306	0.333333
III:2295269..2295294	-	GGGGCTGAAAATTCCGGCGGTTTTGC	1.47461	III:2295272..2295290	+	AAACCGCCGGAATTTTCAG	19	0.382306	0.259259
II:3597639..3597664	-	GGTGAAAACCGGCAAAAAAAGGAACT	1.91153	II:3597642..3597660	+	TCCTTTTTTTGCCGGTTTT	19	0.382306	0.2
II:3303468..3303493	+	GATTTTGGTGACTGACCTCTTCTGAG	2.5123	II:3303472..3303490	-	AGAAGAGGTCAGTCACCAA	19	0.382306	0.152174
II:13478045..13478070	-	GTTGTTAATATAGTGAGTTGGCATTT	2.78537	II:13478048..13478067	+	TGCCAACTCACTATATTAAC	20	0.382306	0.137255
V:19287352..19287377	+	GATAAACAACTTCGACATTTCCAAAA	3.11306	V:19287356..19287374	-	TGGAAATGTCGAAGTTGTT	19	0.382306	0.122807
V:20381894..20381919	-	GATATTTAAAATCATGATATATTTAA	3.49537	V:20381897..20381915	+	AATATATCATGATTTTAAA	19	0.382306	0.109375
V:17315593..17315618	+	GGTTATTTATCAAATTGTTTCCTTCA	3.93229	V:17315598..17315615	-	AGGAAACAATTTGATAAA	18	0.382306	0.0972222
II:3596534..3596559	-	GGCGAGTTTACATTTCATCTTACACA	4.75152	II:3596537..3596554	+	GTAAGATGAAATGTAAAC	18	0.382306	0.0804598
II:3316395..3316420	+	GTCTTTTTTGTCGTTGATTCTGTTTA	5.46152	II:3316398..3316417	-	ACAGAATCAACGACAAAAAA	20	0.382306	0.07
X:17254105..17254130	-	GGCTCATGAGAAGTCGGAAAATATCA	5.78921	X:17254108..17254125	+	TATTTTCCGACTTCTCAT	18	0.382306	0.0660377
IV:17217298..17217323	-	GAAAATTTTTTTTTATTTCACGAGGC	5.84382	IV:17217301..17217321	+	TCGTGAAATAAAAAAAAATTT	21	0.382306	0.0654206
II:2094814..2094839	+	GGCTTCCAGTACTTCTTCGATGTCTT	6.99074	II:2094818..2094836	-	ACATCGAAGAAGTACTGGA	19	0.382306	0.0546875
II:13478002..13478027	-	GCATCTGGTTTGTAATGGTTGTATTT	12.6161	II:13478005..13478025	+	TACAACCATTACAAACCAGAT	21	0.382306	0.030303
V:17073633..17073658	-	GACTTCATGTTGAAAAAGGAAACGTT	15.7292	V:17073636..17073655	+	GTTTCCTTTTTCAACATGAA	20	0.382306	0.0243056
III:3831001..3831026	+	GTTCATATCACTCAAAATTTTACCAA	19.1699	III:3831006..3831023	-	GTAAAATTTTGAGTGATA	18	0.382306	0.019943
X:16952170..16952195	+	GAACAGCGTCGTACGATGAAAGATGA	146.587	X:16952175..16952192	-	TCTTTCATCGTACGACGC	18	0.382306	0.00260805
II:2136813..2136838	+	GATAGATTCTTATTTTCCAACATCCT	1.14692	II:2136816..2136835	-	ATGTTGGAAAATAAGAATCT	20	0.327691	0.285714
II:3373296..3373321	+	GAATGAATAAAGATGAAGTATAATAA	1.20153	II:3373299..3373318	-	TTATACTTCATCTTTATTCA	20	0.327691	0.272727
V:18711609..18711634	-	GCTGGTCCATGCATTTTCAAGAATTC	1.36538	V:18711612..18711631	+	TTCTTGAAAATGCATGGACC	20	0.327691	0.24
II:3373368..3373393	+	GTGTAGGGTTAACAAAAATCAATATT	1.91153	II:3373373..3373390	-	ATTGATTTTTGTTAACCC	18	0.327691	0.171429
X:17253774..17253799	-	GATAATTCGACATTTTATTCGATTCG	1.91153	X:17253777..17253795	+	ATCGAATAAAATGTCGAAT	19	0.327691	0.171429
V:18711414..18711439	-	GTTGCCAGTTGGTAGATTTATTTCCA	2.73076	V:18711417..18711438	+	AAATAAATCTACCAACTGGCAA	22	0.327691	0.12
IV:14774055..14774080	+	GTTTTTCGGCTTCCTTCGCCCTTTTC	2.8946	IV:14774056..14774077	-	AAGGGCGAAGGAAGCCGAAAAA	22	0.327691	0.113208
IV:4071748..4071773	-	GGTTAAAAAAGGACCCCTACTCTACA	3.05845	IV:4071751..4071768	+	AGAGTAGGGGTCCTTTTT	18	0.327691	0.107143
X:16902365..16902390	+	GAACCGCACAAATTATCCAAATTAAC	3.93229	X:16902369..16902387	-	AATTTGGATAATTTGTGCG	19	0.327691	0.0833333
I:2150159..2150184	+	GCCGTGTTGAAAGATCACCTAGACGG	3.98691	I:2150165..2150181	-	TCTAGGTGATCTTTCAA	17	0.327691	0.0821918
IV:14937683..14937708	-	GCGGTATGAGAGGGATTCTTTAAAAG	4.09614	IV:14937686..14937702	+	TTAAAGAATCCCTCTCA	17	0.327691	0.08
IV:14937789..14937814	-	GCATTTTCAGGAATAGTTTATTGAGC	4.83344	IV:14937792..14937814	+	CAATAAACTATTCCTGAAAATGC	23	0.327691	0.0677966
IV:14936629..14936654	+	GCATTTTCAGGAATAGTTTATTGAGC	4.83344	IV:14936629..14936651	-	CAATAAACTATTCCTGAAAATGC	23	0.327691	0.0677966
II:2136865..2136890	+	GCCACGTTGAAATCCACATATTTGAA	5.57075	II:2136869..2136887	-	AAATATGTGGATTTCAACG	19	0.327691	0.0588235
II:3302834..3302859	+	GGCGGGACCTCCATGTTAACGGGCAA	5.73459	II:3302838..3302856	-	CCCGTTAACATGGAGGTCC	19	0.327691	0.0571429
II:2091590..2091615	+	GATACGCCACGACGCGAAGATCTTTG	7.2092	II:2091594..2091612	-	AGATCTTCGCGTCGTGGCG	19	0.327691	0.0454545
I:13412217..13412242	+	GAAGAAGATTGGTAGAGTGCGTTGAC	8.90227	I:13412219..13412239	-	AACGCACTCTACCAATCTTCT	21	0.327691	0.0368098
I:2150210..2150235	+	GATTTCGTCAAGTCGTAGGGTACCCC	9.22996	I:2150212..2150232	-	GTACCCTACGACTTGACGAAA	21	0.327691	0.035503
IV:17217251..17217276	-	GTAGGAAATCCACAGTTTTCGCAGCA	9.33919	IV:17217254..17217274	+	TGCGAAAACTGTGGATTTCCT	21	0.327691	0.0350877
II:1820427..1820452	+	GGTTGGAAATTGCGGCGATAATGATA	9.83073	II:1820431..1820449	-	CATTATCGCCGCAATTTCC	19	0.327691	0.0333333
V:18720995..18721020	+	GGAACAATTCATGATTCTACTCGAAG	10.5953	V:18720995..18721017	-	CGAGTAGAATCATGAATTGTTCC	23	0.327691	0.0309278
II:2136734..2136759	+	GCATTGTCCAGAGGCATATGAGCATT	13.2169	II:2136739..2136756	-	GCTCATATGCCTCTGGAC	18	0.327691	0.0247934
I:13410448..13410473	+	GATTGGAGATTCGTCCGTGCCGTTAG	13.4353	I:13410454..13410470	-	ACGGCACGGACGAATCT	17	0.327691	0.0243902
II:3596630..3596655	-	GTTTGCTCGACCGACGGCGAAGTTTG	13.7084	II:3596633..3596652	+	ACTTCGCCGTCGGTCGAGCA	20	0.327691	0.0239044
IV:8598397..8598422	-	GCAGTTGTCCATTGTTTTTATTGATC	16.2753	IV:8598400..8598420	+	CAATAAAAACAATGGACAACT	21	0.327691	0.0201342
II:1820415..1820440	+	GGTCTTCTAAAAGGTTGGAAATTGCG	20.7538	II:1820419..1820437	-	AATTTCCAACCTTTTAGAA	19	0.327691	0.0157895
II:2094573..2094598	+	GTAAAATCCGCTTGAGGTGTGGAACA	22.8838	II:2094574..2094595	-	TCCACACCTCAAGCGGATTTTA	22	0.327691	0.0143198
II:3306353..3306378	+	GCTGTTTTCGGTAAAAATTCTTCTCA	79.5743	II:3306357..3306375	-	GAAGAATTTTTACCGAAAA	19	0.327691	0.00411805
I:2150206..2150231	+	GATTGATTTCGTCAAGTCGTAGGGTA	88.7497	I:2150212..2150228	-	CCTACGACTTGACGAAA	17	0.327691	0.00369231
II:2136870..2136895	+	GTTGAAATCCACATATTTGAAGATCC	1.0923	II:2136872..2136892	-	TCTTCAAATATGTGGATTTCA	21	0.273076	0.25
IV:3579442..3579467	-	GACAATAAATGCAGTAAAAGAATCTT	1.14692	IV:3579445..3579463	+	ATTCTTTTACTGCATTTAT	19	0.273076	0.238095
I:472386..472411	-	GACTCAGATCCCAAACTTGTCACCAC	1.52922	I:472389..472406	+	GTGACAAGTTTGGGATCT	18	0.273076	0.178571
II:1820479..1820504	+	GTTTTTATCTCAGGGCGTTGTATACG	1.69307	II:1820482..1820501	-	ATACAACGCCCTGAGATAAA	20	0.273076	0.16129
I:2150749..2150774	+	GTGACAAGCCCTCGAGCACACCGATC	1.74769	I:2150752..2150771	-	CGGTGTGCTCGAGGGCTTGT	20	0.273076	0.15625
II:13478951..13478976	-	GAGGTAACGCAAATGCAGTAAGTGAC	1.85692	II:13478954..13478974	+	ACTTACTGCATTTGCGTTACC	21	0.273076	0.147059
I:13410612..13410637	+	GATTTTTTCCACACCGGCGTACAAGC	1.91153	I:13410615..13410634	-	TGTACGCCGGTGTGGAAAAA	20	0.273076	0.142857
X:17237905..17237930	+	GTGGCTTACTGTAGAAAAACATTACA	1.96615	X:17237910..17237927	-	AATGTTTTTCTACAGTAA	18	0.273076	0.138889
II:2091856..2091881	+	GGATCGGTTTGTATTCCATCTTTCGA	2.07538	II:2091859..2091878	-	AAAGATGGAATACAAACCGA	20	0.273076	0.131579
I:2150898..2150923	+	GACTCTAGCAGAGTGTCGAGCATCTC	2.12999	I:2150901..2150920	-	ATGCTCGACACTCTGCTAGA	20	0.273076	0.128205
IV:17217374..17217399	-	GTTGACTCTCCATCGGTTCTTATTTT	2.8946	IV:17217377..17217398	+	ATAAGAACCGATGGAGAGTCAA	22	0.273076	0.0943396
III:3830673..3830698	+	GTCCATCAGTCTGTTGATTCCGGCAA	3.05845	III:3830676..3830695	-	CCGGAATCAACAGACTGATG	20	0.273076	0.0892857
II:3309189..3309214	+	GATCTTTTGATTTCTCAGGAAATATT	3.2223	II:3309193..3309211	-	ATTTCCTGAGAAATCAAAA	19	0.273076	0.0847458
II:3303172..3303197	+	GTTAGGGAGTTTGTCGGAGACTTCAC	3.49537	II:3303175..3303194	-	AAGTCTCCGACAAACTCCCT	20	0.273076	0.078125
II:2502190..2502215	+	GGTATTTGAATACTTTTATTGAGTCG	3.82306	II:2502194..2502212	-	CTCAATAAAAGTATTCAAA	19	0.273076	0.0714286
II:13478762..13478787	-	GACCTTTATCCATTCTTGAACATCGC	4.15075	II:13478765..13478784	+	ATGTTCAAGAATGGATAAAG	20	0.273076	0.0657895
II:3304236..3304261	+	GACGAAGGCATTTCCGTGTTCCAATA	4.53306	II:3304241..3304258	-	TGGAACACGGAAATGCCT	18	0.273076	0.060241
V:19290675..19290700	+	GACAATCAAATTCTTCTGATTATGGC	4.96998	V:19290675..19290697	-	ATAATCAGAAGAATTTGATTGTC	23	0.273076	0.0549451
II:13478007..13478032	-	GATTAGCATCTGGTTTGTAATGGTTG	5.0246	II:13478010..13478029	+	CCATTACAAACCAGATGCTA	20	0.273076	0.0543478
V:20380669..20380694	-	GTTCTTGTGTAGGATGGTGTTAATGT	5.18844	V:20380672..20380690	+	TTAACACCATCCTACACAA	19	0.273076	0.0526316
V:18722715..18722740	+	GGAGTGGTTCATAAAGTGAGTTGCCA	5.78921	V:18722717..18722737	-	CAACTCACTTTATGAACCACT	21	0.273076	0.0471698
II:2091820..2091845	+	GGTTGGGGAAACTTCGAAACAGCTTT	5.84382	II:2091824..2091842	-	GCTGTTTCGAAGTTTCCCC	19	0.273076	0.046729
V:17073504..17073529	-	GGCGCAAGTGCGACATAAAGGGAACA	6.55382	V:17073507..17073524	+	TCCCTTTATGTCGCACTT	18	0.273076	0.0416667
V:19287047..19287072	+	GTATTAAAAAAACAGTTAAAAAAGGT	6.71767	V:19287050..19287069	-	TTTTTTAACTGTTTTTTTAA	20	0.273076	0.0406504
II:13477975..13478000	-	GAATTCGGTATACCGGTTATTAGTGC	7.59151	II:13477978..13477997	+	CTAATAACCGGTATACCGAA	20	0.273076	0.0359712
II:3373795..3373820	+	GCTTGTGACATTTGACGCCTTTGAAA	8.41074	II:3373798..3373817	-	CAAAGGCGTCAAATGTCACA	20	0.273076	0.0324675
X:16952247..16952272	+	GCTCGGTTGCGCTGCTCCAGTATTTA	9.55765	X:16952251..16952269	-	ATACTGGAGCAGCGCAACC	19	0.273076	0.0285714
II:3310601..3310626	+	GTTGTTGCATGACTCTTGGTGTTGTA	9.7215	II:3310605..3310623	-	AACACCAAGAGTCATGCAA	19	0.273076	0.0280899
II:3304202..3304227	+	GTGTCGAATGGGTCCATTGTATTTTC	10.5953	II:3304205..3304224	-	AATACAATGGACCCATTCGA	20	0.273076	0.0257732
X:17237607..17237632	+	GTGTGATTAGTAGTTTATTGAGTAAT	15.4561	X:17237610..17237629	-	ACTCAATAAACTACTAATCA	20	0.273076	0.0176678
IV:4071466..4071491	-	GGTCAATTGTTGTGAAGCTAGCTCCC	17.4769	IV:4071469..4071489	+	AGCTAGCTTCACAACAATTGA	21	0.273076	0.015625
II:3306724..3306749	+	GAGTTTTGTCTTCAAATGTTGCTTGG	19.3884	II:3306728..3306746	-	AGCAACATTTGAAGACAAA	19	0.273076	0.0140845
II:2503630..2503655	+	GTATTATAATATCGTTTATTGAGCAG	23.2661	II:2503634..2503652	-	CTCAATAAACGATATTATA	19	0.273076	0.0117371
II:2091566..2091591	+	GAAAATTTATATTACGCCACAAGAGA	24.9045	II:2091569..2091588	-	CTTGTGGCGTAATATAAATT	20	0.273076	0.0109649
II:3291753..3291778	-	GCATTTATTCAACAAATTTCAATCGG	32.1683	II:3291756..3291774	+	ATTGAAATTTGTTGAATAA	19	0.273076	0.00848896
IV:3579416..3579441	-	GAAATGATATGTGGAGTCTAATATTC	36.8106	IV:3579419..3579441	+	TATTAGACTCCACATATCATTTC	23	0.273076	0.0074184
V:20384261..20384286	-	GATATTCTGTATGAGGTGTCTAAATA	43.9106	V:20384264..20384283	+	TTAGACACCTCATACAGAAT	20	0.273076	0.00621891
V:19732150..19732175	-	GAAAAGGTTAGTTGTAAGGTTTTTTC	50.6283	V:19732153..19732174	+	AAAACCTTACAACTAACCTTTT	22	0.273076	0.00539374
III:2233925..2233950	-	GATTCCAAATTTATCAACGGCTGTTC	59.2028	III:2233928..2233946	+	CAGCCGTTGATAAATTTGG	19	0.273076	0.00461255
II:2501897..2501922	+	GATACACATGGGGATTGTTCAGTTTC	86.7835	II:2501901..2501919	-	ACTGAACAATCCCCATGTG	19	0.273076	0.00314663
I:13411858..13411883	+	GCATCCATGCAAGCATAGTGGATTTG	1.63846	I:13411861..13411880	-	ATCCACTATGCTTGCATGGA	20	0.245768	0.15
IV:15647121..15647146	+	GCATCCATGCAAGCATAGTGGATTTG	1.63846	IV:15647124..15647143	-	ATCCACTATGCTTGCATGGA	20	0.245768	0.15
IV:14937765..14937790	-	GCACAGTAACTGTCCAATGTTGTACC	2.78537	IV:14937768..14937788	+	ACAACATTGGACAGTTACTGT	21	0.245768	0.0882353
IV:14936653..14936678	+	GCACAGTAACTGTCCAATGTTGTACC	2.78537	IV:14936655..14936675	-	ACAACATTGGACAGTTACTGT	21	0.245768	0.0882353
II:3306788..3306813	+	GACAAACTCGAAAGTCGGATACTTTT	8.95689	II:3306792..3306810	-	AGTATCCGACTTTCGAGTT	19	0.245768	0.027439
II:3596626..3596651	-	GCTCGACCGACGGCGAAGTTTGTGGC	1.03769	II:3596629..3596650	+	ACAAACTTCGCCGTCGGTCGAG	22	0.218461	0.210526
IV:3578690..3578715	-	GCAGCCATTATAACACTATGTTGTCC	1.03769	IV:3578693..3578713	+	CAACATAGTGTTATAATGGCT	21	0.218461	0.210526
X:1736171..1736196	-	GTGAGTCCTTTCGCCTTAACAATGAT	1.0923	X:1736174..1736195	+	ATTGTTAAGGCGAAAGGACTCA	22	0.218461	0.2
V:20383702..20383727	-	GCTCAATTTTTGGCGGGAATTCAAAT	1.0923	V:20383705..20383725	+	TGAATTCCCGCCAAAAATTGA	21	0.218461	0.2
II:2091752..2091777	+	GATCGTAGTTGATCCACAAAGTTTTT	1.0923	II:2091754..2091774	-	AACTTTGTGGATCAACTACGA	21	0.218461	0.2
X:1405530..1405555	-	GGTATGAATCATCAAAGAGGTTTCAT	1.13326	X:1405533..1405551	+	AAACCTCTTTGATGATTCA	19	0.218461	0.192771
I:13408625..13408650	+	GGTATGAATCATCAAAGAGGTTTCAT	1.13326	I:13408629..13408647	-	AAACCTCTTTGATGATTCA	19	0.218461	0.192771
I:13410525..13410550	+	GGTATGAATCATCAAAGAGGTTTCAT	1.13326	I:13410529..13410547	-	AAACCTCTTTGATGATTCA	19	0.218461	0.192771
X:16952083..16952108	+	GGTATGAATCATCAAAGAGGTTTCAT	1.13326	X:16952087..16952105	-	AAACCTCTTTGATGATTCA	19	0.218461	0.192771
V:18722276..18722301	+	GTGTTGGTAACTTCAAATGTTTTTAC	1.20153	V:18722280..18722298	-	AAAACATTTGAAGTTACCA	19	0.218461	0.181818
IV:17220425..17220450	-	GGAAGATATTCTGATTTAATTTATAT	1.25615	IV:17220428..17220447	+	TAAATTAAATCAGAATATCT	20	0.218461	0.173913
II:3309197..3309222	+	GATTTCTCAGGAAATATTCAGCTTCG	1.25615	II:3309201..3309219	-	AGCTGAATATTTCCTGAGA	19	0.218461	0.173913
IV:8597816..8597841	-	GAAAATCATTTTGCTCGATATACCGG	1.25615	IV:8597819..8597837	+	GTATATCGAGCAAAATGAT	19	0.218461	0.173913
IV:3579389..3579414	-	GTGTGTCTTTAAACTTTCTTTTTTTT	1.31076	IV:3579392..3579414	+	AAAAAGAAAGTTTAAAGACACAC	23	0.218461	0.166667
X:17254003..17254028	-	GGGGCCATATGTCGTCAAGGAAGTCG	1.36538	X:17254006..17254024	+	CTTCCTTGACGACATATGG	19	0.218461	0.16
V:17315726..17315751	+	GGTTCCTTGACAGTGCGTCTGCAGTC	1.47461	V:17315730..17315748	-	TGCAGACGCACTGTCAAGG	19	0.218461	0.148148
X:16902393..16902418	+	GGAAATCGATATAATTTTTTGGCACC	1.47461	X:16902393..16902415	-	GCCAAAAAATTATATCGATTTCC	23	0.218461	0.148148
II:3302787..3302812	+	GCTTTGAGCTTACAGAGAACGTTTAG	1.52922	II:3302791..3302809	-	AACGTTCTCTGTAAGCTCA	19	0.218461	0.142857
V:19287388..19287413	+	GCATGTGTTTCTTGATTGAAATTTTC	1.69307	V:19287391..19287410	-	AATTTCAATCAAGAAACACA	20	0.218461	0.129032
II:1820392..1820417	+	GATCCAGATCAAGATTATTTTTTGGT	1.69307	II:1820395..1820414	-	AAAAAATAATCTTGATCTGG	20	0.218461	0.129032
I:2150216..2150241	+	GTCAAGTCGTAGGGTACCCCATTGCC	1.8023	I:2150217..2150238	-	AATGGGGTACCCTACGACTTGA	22	0.218461	0.121212
X:1779641..1779666	-	GTGTTTATGGTTATGCTTGAATGAGC	1.85692	X:1779644..1779665	+	CATTCAAGCATAACCATAAACA	22	0.218461	0.117647
X:8144088..8144113	-	GTGTTTATGGTTATGCTTGAATGAGC	1.85692	X:8144091..8144112	+	CATTCAAGCATAACCATAAACA	22	0.218461	0.117647
V:19290648..19290673	+	GTGGTTTTTAAATAAAAAAAGGTGGC	1.91153	V:19290649..19290670	-	ACCTTTTTTTATTTAAAAACCA	22	0.218461	0.114286
V:17539219..17539244	+	GCGTTTTTCCTGGCAAACTGTGTCCA	1.96615	V:17539225..17539241	-	ACACAGTTTGCCAGGAA	17	0.218461	0.111111
V:19731437..19731462	-	GTCCCAGCTGCACCATTTATCATTAA	2.02076	V:19731440..19731459	+	ATGATAAATGGTGCAGCTGG	20	0.218461	0.108108
X:1780097..1780122	-	GCGGATGTAACAATTGGATGATCAAA	2.02076	X:1780100..1780120	+	GATCATCCAATTGTTACATCC	21	0.218461	0.108108
II:3305343..3305368	+	GTTGAGGATTTCACGGAGGCTTAGTC	2.12999	II:3305348..3305365	-	TAAGCCTCCGTGAAATCC	18	0.218461	0.102564
III:1374808..1374833	-	GAAATTTTTCGTGGTTCAATTGGAAC	2.12999	III:1374811..1374831	+	CCAATTGAACCACGAAAAATT	21	0.218461	0.102564
II:3303396..3303421	+	GTACTTGCTCCACGCTAACGAAATAC	2.18461	II:3303398..3303418	-	TTTCGTTAGCGTGGAGCAAGT	21	0.218461	0.1
X:1984759..1984784	-	GTGAACAAGTAACCAAGAAATTTAAG	2.29384	X:1984762..1984780	+	AAATTTCTTGGTTACTTGT	19	0.218461	0.0952381
IV:15647447..15647472	+	GGCTTTCCGGTTTCATAGAAGTTGGC	2.5123	IV:15647447..15647469	-	AACTTCTATGAAACCGGAAAGCC	23	0.218461	0.0869565
II:3596740..3596765	-	GATATTGCATTATTTAGATAAATTAT	2.5123	II:3596743..3596764	+	ATTTATCTAAATAATGCAATAT	22	0.218461	0.0869565
II:3291701..3291726	-	GCAATTTTCCCGTCGTATCTTTGTCG	2.56691	II:3291704..3291722	+	CAAAGATACGACGGGAAAA	19	0.218461	0.0851064
IV:4071406..4071431	-	GAGTTTTTGTCGCGCTCTCGAGGCAG	2.56691	IV:4071409..4071427	+	CCTCGAGAGCGCGACAAAA	19	0.218461	0.0851064
IV:17217222..17217247	-	GTTTCATTCCAGAACGTGATTTTTTC	2.62153	IV:17217225..17217244	+	AAAATCACGTTCTGGAATGA	20	0.218461	0.0833333
I:2150008..2150033	+	GCGTCTGCGGAAGTGGTCTTCTACCG	2.67614	I:2150013..2150030	-	TAGAAGACCACTTCCGCA	18	0.218461	0.0816327
II:3373164..3373189	+	GTGCATGATGATTTATTGAAGGAAAA	2.78537	II:3373164..3373186	-	TCCTTCAATAAATCATCATGCAC	23	0.218461	0.0784314
IV:15649813..15649838	+	GTATTAAATTTTACAACGGTCATGAT	2.78537	IV:15649816..15649835	-	ATGACCGTTGTAAAATTTAA	20	0.218461	0.0784314
III:3153193..3153218	-	GAAGTTCATATCTTGTGAAATCGTTG	2.78537	III:3153196..3153213	+	CGATTTCACAAGATATGA	18	0.218461	0.0784314
II:13477995..13478020	-	GTTTGTAATGGTTGTATTTCGAATTC	2.8946	II:13477998..13478017	+	TTCGAAATACAACCATTACA	20	0.218461	0.0754717
X:16952278..16952303	+	GATTTTTGAACCATTCCGCTGTCCGT	2.94922	X:16952282..16952300	-	GACAGCGGAATGGTTCAAA	19	0.218461	0.0740741
II:2136663..2136688	+	GGGTTTCCTTCTATACTTGCAAGATG	3.00383	II:2136664..2136685	-	CTTGCAAGTATAGAAGGAAACC	22	0.218461	0.0727273
II:13478108..13478133	-	GCTTTTGAAGAACTTGGTTTGTTCCG	3.44076	II:13478111..13478129	+	AACAAACCAAGTTCTTCAA	19	0.218461	0.0634921
II:13477871..13477896	-	GCTCTTCTTTCAGCATTCACTTTCCG	3.82306	II:13477874..13477894	+	AAAGTGAATGCTGAAAGAAGA	21	0.218461	0.0571429
II:3304156..3304181	+	GTCCAGTAGTTCCTGAATATTAGGCA	3.87768	II:3304160..3304178	-	CTAATATTCAGGAACTACT	19	0.218461	0.056338
II:3304231..3304256	+	GGACCGACGAAGGCATTTCCGTGTTC	4.36921	II:3304236..3304253	-	CACGGAAATGCCTTCGTC	18	0.218461	0.05
I:13410002..13410027	+	GGTTGGATTAGAAGGTTGGACATCTG	4.58767	I:13410006..13410024	-	ATGTCCAACCTTCTAATCC	19	0.218461	0.047619
III:2427244..2427269	-	GGCATTGACACTTGGTATCGGATATT	4.6969	III:2427247..2427265	+	ATCCGATACCAAGTGTCAA	19	0.218461	0.0465116
II:3310571..3310596	+	GTGTCAGTGACTTATCAAAATAGCAT	4.86075	II:3310571..3310593	-	CTATTTTGATAAGTCACTGACAC	23	0.218461	0.0449438
IV:14937405..14937430	-	GTTTTTTATATCGATATGTTTATTGA	5.13383	IV:14937408..14937429	+	ATAAACATATCGATATAAAAAA	22	0.218461	0.0425532
I:13412117..13412142	+	GGATACGCCAAAGCACAATTGTCTGG	5.18844	I:13412122..13412139	-	GACAATTGTGCTTTGGCG	18	0.218461	0.0421053
II:2503488..2503513	+	GGCAAAACCAGTATTTGATATTAACG	5.46152	II:2503491..2503510	-	TAATATCAAATACTGGTTTT	20	0.218461	0.04
IV:4071381..4071406	-	GAACAGAAGTAGACGTGCTCCAGTGT	5.46152	IV:4071384..4071401	+	CTGGAGCACGTCTACTTC	18	0.218461	0.04
IV:17217342..17217367	-	GAATGCGAGTTTAAAAGTTACTATTA	5.57075	IV:17217345..17217364	+	TAGTAACTTTTAAACTCGCA	20	0.218461	0.0392157
II:3302807..3302832	+	GTTTAGCTTCGAACAGGTTCTCCTTC	5.67998	II:3302810..3302829	-	GGAGAACCTGTTCGAAGCTA	20	0.218461	0.0384615
IV:15647455..15647480	+	GGTTTCATAGAAGTTGGCTCATAATA	6.38997	IV:15647459..15647477	-	TATGAGCCAACTTCTATGA	19	0.218461	0.034188
X:1780566..1780591	-	GACTAAACATGAAACAATGATTTTGA	7.09997	X:1780569..1780586	+	AAATCATTGTTTCATGTT	18	0.218461	0.0307692
X:17253890..17253915	-	GTCATTTCGATTTTTTGTCTTTATTG	7.64612	X:17253893..17253911	+	TAAAGACAAAAAATCGAAA	19	0.218461	0.0285714
IV:17217237..17217262	-	GTTTTCGCAGCACTCGTTTCATTCCA	7.80997	IV:17217240..17217262	+	AATGAAACGAGTGCTGCGAAAAC	23	0.218461	0.027972
IV:17217228..17217253	-	GCACTCGTTTCATTCCAGAACGTGAT	8.90227	IV:17217231..17217251	+	ACGTTCTGGAATGAAACGAGT	21	0.218461	0.0245399
V:17159044..17159069	+	GCTCGGAAGTCAATACAAAATCTCCA	9.66689	V:17159048..17159066	-	AGATTTTGTATTGACTTCC	19	0.218461	0.0225989
V:20381862..20381887	-	GATGCAGATCTGACGAGTCTCGAACG	9.88535	V:20381865..20381882	+	TCGAGACTCGTCAGATCT	18	0.218461	0.0220994
IV:3579103..3579128	-	GTGATATTCCAATGGGTCGATATGTT	9.93996	IV:3579106..3579124	+	ATATCGACCCATTGGAATA	19	0.218461	0.021978
V:20384266..20384291	-	GAACAGATATTCTGTATGAGGTGTCT	10.923	V:20384269..20384287	+	CACCTCATACAGAATATCT	19	0.218461	0.02
III:3830800..3830825	+	GGGATTTCGTCAAGACCGAGGAGCTT	11.7423	III:3830800..3830822	-	CTCCTCGGTCTTGACGAAATCCC	23	0.218461	0.0186047
II:2502166..2502191	+	GGAAACGTTCTAAGTTATTTTTCTGG	12.1246	II:2502171..2502188	-	GAAAAATAACTTAGAACG	18	0.218461	0.018018
II:2094671..2094696	+	GGTTGAGGAAACTTGGCAATAGCTTT	12.6707	II:2094675..2094693	-	GCTATTGCCAAGTTTCCTC	19	0.218461	0.0172414
X:17254154..17254179	-	GGAAAACTGTATTACGGTGGAGTCTG	13.053	X:17254157..17254176	+	ACTCCACCGTAATACAGTTT	20	0.218461	0.0167364
I:11824837..11824862	+	GATTGGAATAGGAGCACAAGAACTGA	14.6369	I:11824841..11824859	-	GTTCTTGTGCTCCTATTCC	19	0.218461	0.0149254
V:19287070..19287095	+	GGTTAAGAAAGAACTTTTTTTGTGAT	16.5484	V:19287075..19287092	-	ACAAAAAAAGTTCTTTCT	18	0.218461	0.0132013
II:2094790..2094815	+	GAGCTTCATTCCCGATTTGAGTATGG	18.2961	II:2094794..2094812	-	TACTCAAATCGGGAATGAA	19	0.218461	0.0119403
V:19287215..19287240	+	GTTATCATTTGTCGTCTTGGTCCAAA	20.6991	V:19287217..19287237	-	GGACCAAGACGACAAATGATA	21	0.218461	0.0105541
V:20384323..20384348	-	GAGTGTCTATTAAAATTATTTAAACA	21.5184	V:20384326..20384345	+	TTAAATAATTTTAATAGACA	20	0.218461	0.0101523
II:3309304..3309329	+	GTTAGCTTTACCAGGTCTATAGACTA	25.3961	II:3309308..3309326	-	TCTATAGACCTGGTAAAGC	19	0.218461	0.00860215
I:2149978..2150003	+	GAGTTCGGGGTGTCTTAGTTGCACGT	27.1437	I:2149982..2150000	-	TGCAACTAAGACACCCCGA	19	0.218461	0.00804829
X:16952224..16952249	+	GCTTCTCGGCAATATCATTGTGAGCT	32.7145	X:16952226..16952246	-	TCACAATGATATTGCCGAGAA	21	0.218461	0.0066778
II:2136808..2136833	+	GTCTTGATAGATTCTTATTTTCCAAC	33.8614	II:2136809..2136830	-	GGAAAATAAGAATCTATCAAGA	22	0.218461	0.00645161
V:17073531..17073556	-	GTTCAGGTCATCGGAAAACCAGCATC	57.7829	V:17073534..17073552	+	GCTGGTTTTCCGATGACCT	19	0.218461	0.00378072
II:2094854..2094879	+	GTTCGATTCGTCGAGCCGTAACATTC	60.5136	II:2094858..2094876	-	TGTTACGGCTCGACGAATC	19	0.218461	0.00361011
II:2094701..2094726	+	GTTTTCGGATCTGTCTGTATGCCTTC	114.2	II:2094703..2094723	-	GGCATACAGACAGATCCGAAA	21	0.218461	0.00191296
IV:14937733..14937758	-	GGTTGTTAATAGTGATTGATAATATT	1.14692	IV:14937736..14937753	+	ATTATCAATCACTATTAA	18	0.191153	0.166667
II:3306708..3306733	+	GGACCTCTCCCTTCCAGAGTTTTGTC	1.36538	II:3306708..3306730	-	AAAACTCTGGAAGGGAGAGGTCC	23	0.191153	0.14
III:2428533..2428558	-	GTAGCTTGGTTGGCCTCATTTAGATA	1.03769	III:2428536..2428553	+	CTAAATGAGGCCAACCAA	18	0.163846	0.157895
IV:17217170..17217195	-	GATCATGTCTGTCCCAAAAAAAGTTA	1.0923	IV:17217173..17217191	+	CTTTTTTTGGGACAGACAT	19	0.163846	0.15
III:3153260..3153285	-	GAGGATATTGCAGTCTTGTGAAGTTA	1.0923	III:3153263..3153280	+	CTTCACAAGACTGCAATA	18	0.163846	0.15
IV:17217556..17217581	-	GATCTATTGTATGTGTTCATTTTTCT	1.14692	IV:17217559..17217579	+	AAAATGAACACATACAATAGA	21	0.163846	0.142857
III:2295332..2295357	-	GTTTTGAATAAAGTTTGCTGAAAGTC	1.20153	III:2295335..2295353	+	TTTCAGCAAACTTTATTCA	19	0.163846	0.136364
III:2428595..2428620	-	GTTTTCTTTTCATGTGATTGCAATCA	1.20153	III:2428598..2428616	+	TTGCAATCACATGAAAAGA	19	0.163846	0.136364
III:3830647..3830672	+	GTTGTTGGGACGTTTTTCTTGTCATC	1.20153	III:3830651..3830669	-	GACAAGAAAAACGTCCCAA	19	0.163846	0.136364
I:11811270..11811295	+	GTTATGATGCGAGCCGTTTCTACAAT	1.20153	I:11811274..11811292	-	GTAGAAACGGCTCGCATCA	19	0.163846	0.136364
II:3304211..3304236	+	GGGTCCATTGTATTTTCTCAGGACCG	1.20153	II:3304211..3304233	-	TCCTGAGAAAATACAATGGACCC	23	0.163846	0.136364
III:2425590..2425615	-	GTATTTATTGGCAATAATGATAATAA	1.36538	III:2425593..2425612	+	TTATCATTATTGCCAATAAA	20	0.163846	0.12
III:3830358..3830383	+	GGCATCCCCCCTCCTGTGGAAGTAGA	1.36538	III:3830359..3830380	-	ACTTCCACAGGAGGGGGGATGC	22	0.163846	0.12
X:1984710..1984735	-	GAATTCAATTCCGCCAGTATAGTCCG	1.36538	X:1984713..1984732	+	ACTATACTGGCGGAATTGAA	20	0.163846	0.12
X:1779692..1779717	-	GCATCATATAGTTCACCGTTCTCTTC	1.41999	X:1779695..1779714	+	GAGAACGGTGAACTATATGA	20	0.163846	0.115385
III:2427599..2427624	-	GTGACACTTCCTATCTTCTATATTTC	1.47461	III:2427602..2427623	+	ATATAGAAGATAGGAAGTGTCA	22	0.163846	0.111111
II:3303241..3303266	+	GTCGGGAGCTCTTCATTTTCTTGAAA	1.47461	II:3303244..3303263	-	CAAGAAAATGAAGAGCTCCC	20	0.163846	0.111111
X:16952398..16952423	+	GCCATGCAAAACGTTTTGCTCTGCGA	1.47461	X:16952404..16952420	-	CAGAGCAAAACGTTTTG	17	0.163846	0.111111
II:2502001..2502026	+	GAGATCTACGCCTTGATCTTTCTTGC	1.52922	II:2502005..2502023	-	AGAAAGATCAAGGCGTAGA	19	0.163846	0.107143
I:13410660..13410685	+	GAAGATTGTCATTTTGACCGTTTTTC	1.52922	I:13410663..13410682	-	AAACGGTCAAAATGACAATC	20	0.163846	0.107143
III:2295304..2295329	-	GAACAGAACAATATTTTATTTTCATA	1.52922	III:2295307..2295324	+	GAAAATAAAATATTGTTC	18	0.163846	0.107143
X:17253190..17253215	-	GACTCATCTTGTATTAAATCCAAATC	1.58384	X:17253193..17253213	+	TTGGATTTAATACAAGATGAG	21	0.163846	0.103448
X:16952391..16952416	+	GTTTCCAGCCATGCAAAACGTTTTGC	1.63846	X:16952392..16952413	-	AAACGTTTTGCATGGCTGGAAA	22	0.163846	0.1
II:13473315..13473340	-	GGCATCTATGTATGCAACGGGTTGAC	1.63846	II:13473318..13473340	+	AACCCGTTGCATACATAGATGCC	23	0.163846	0.1
IV:16347501..16347526	-	GTACTATTACTTCTTTTATTGCGAGT	1.69307	IV:16347504..16347522	+	CGCAATAAAAGAAGTAATA	19	0.163846	0.0967742
X:17237733..17237758	+	GGGTCACTTGCACTCGCAACTGTAAG	1.74769	X:17237733..17237755	-	ACAGTTGCGAGTGCAAGTGACCC	23	0.163846	0.09375
X:17254012..17254037	-	GCAATTCACGGGGCCATATGTCGTCA	1.74769	X:17254015..17254035	+	CGACATATGGCCCCGTGAATT	21	0.163846	0.09375
X:17253467..17253492	-	GCAAATCCGTTTTGCCTACATGGCCA	1.74769	X:17253470..17253489	+	CCATGTAGGCAAAACGGATT	20	0.163846	0.09375
V:18711539..18711564	-	GTTGCTTCGTTTTTGAACTCTTCGTC	1.85692	V:18711542..18711562	+	GAAGAGTTCAAAAACGAAGCA	21	0.163846	0.0882353
IV:15650102..15650127	+	GACAGTCCTTGAATAGTGTGTGATTT	1.85692	IV:15650105..15650124	-	TCACACACTATTCAAGGACT	20	0.163846	0.0882353
X:1780048..1780073	-	GTTTTTCAAGTGGACTCGTTGAATCG	1.91153	X:1780051..1780072	+	TTCAACGAGTCCACTTGAAAAA	22	0.163846	0.0857143
II:3373277..3373302	+	GTTGTATGAGAGAATAAATGAATGAA	1.96615	II:3373277..3373299	-	ATTCATTTATTCTCTCATACAAC	23	0.163846	0.0833333
II:3596775..3596800	-	GAAATTTATTATTACAAAAAATTAAA	1.96615	II:3596778..3596796	+	AATTTTTTGTAATAATAAA	19	0.163846	0.0833333
X:1780404..1780429	-	GAAACGCAACCTGTTTTTGAGCTTGA	1.96615	X:1780407..1780425	+	AGCTCAAAAACAGGTTGCG	19	0.163846	0.0833333
II:3306677..3306702	+	GGCAGCTGCTCTTTTTGCTATCATCT	2.02076	II:3306682..3306699	-	TGATAGCAAAAAGAGCAG	18	0.163846	0.0810811
II:3373670..3373695	+	GTTGGAAATAGTTGTTATAGTCAGCT	2.12999	II:3373673..3373692	-	TGACTATAACAACTATTTCC	20	0.163846	0.0769231
V:18280194..18280219	+	GTATTTTTTCACGATCTCATCCAACT	2.12999	V:18280196..18280216	-	TGGATGAGATCGTGAAAAAAT	21	0.163846	0.0769231
III:1376440..1376465	-	GAGGTGTTGTAGACATATGGTGCGGT	2.12999	III:1376443..1376461	+	GCACCATATGTCTACAACA	19	0.163846	0.0769231
III:2425561..2425586	-	GAATAAAATTAATAATGTCACAATGT	2.12999	III:2425564..2425581	+	TTGTGACATTATTAATTT	18	0.163846	0.0769231
II:3306748..3306773	+	GGATAATAAATACTCTGTGCTTGCCC	2.29384	II:3306754..3306770	-	CAAGCACAGAGTATTTA	17	0.163846	0.0714286
IV:15861077..15861102	+	GTCATCTCTGTTCGTTTTGGTGTGAC	2.34845	IV:15861078..15861099	-	ACACCAAAACGAACAGAGATGA	22	0.163846	0.0697674
X:1779751..1779776	-	GTTCCATCTCAAATATCTGCTTTTCC	2.37576	X:1779754..1779773	+	AAAGCAGATATTTGAGATGG	20	0.163846	0.0689655
X:8144198..8144223	-	GTTCCATCTCAAATATCTGCTTTTCC	2.37576	X:8144201..8144220	+	AAAGCAGATATTTGAGATGG	20	0.163846	0.0689655
II:13478255..13478280	-	GTTTACACCGCTCCATTGTTTTAGCA	2.45768	II:13478258..13478279	+	TAAAACAATGGAGCGGTGTAAA	22	0.163846	0.0666667
I:13412769..13412794	+	GATTGTACTGGTGTCGTGATGTTGTT	2.45768	I:13412773..13412791	-	AACATCACGACACCAGTAC	19	0.163846	0.0666667
III:2427348..2427373	-	GCTGAGTGTTTCTGTTGCGATTATTA	2.5123	III:2427351..2427371	+	TAATCGCAACAGAAACACTCA	21	0.163846	0.0652174
III:2427399..2427424	-	GTTTAGCCTCACCGGATCCTTTGATT	2.67614	III:2427402..2427420	+	CAAAGGATCCGGTGAGGCT	19	0.163846	0.0612245
X:1795229..1795254	-	GACACTACCAAGGAGAGAATTGTCAG	2.73076	X:1795232..1795249	+	ACAATTCTCTCCTTGGTA	18	0.163846	0.06
II:3310624..3310649	+	GTATGCAAAAGCCACTTTTTCTCAAA	2.78537	II:3310628..3310646	-	GAGAAAAAGTGGCTTTTGC	19	0.163846	0.0588235
II:3302900..3302925	+	GGCTCCCTCAATGTATGGACGAAATT	2.8946	II:3302903..3302922	-	TTCGTCCATACATTGAGGGA	20	0.163846	0.0566038
II:3305240..3305265	+	GCTTCCTCTCGCTTTCTTTTTTTGGT	2.8946	II:3305244..3305262	-	AAAAAAAGAAAGCGAGAGG	19	0.163846	0.0566038
III:3149093..3149118	-	GGAACCCTTTCGACGATGTTGTACAC	2.94922	III:3149096..3149114	+	TACAACATCGTCGAAAGGG	19	0.163846	0.0555556
IV:3578543..3578568	-	GTGATTCGGCTACAATACATTCCATA	3.00383	IV:3578546..3578564	+	GGAATGTATTGTAGCCGAA	19	0.163846	0.0545455
X:17254078..17254103	-	GGATGTAAGGTTTGAGTTAGAAGATA	3.00383	X:17254081..17254099	+	CTTCTAACTCAAACCTTAC	19	0.163846	0.0545455
V:19287557..19287582	+	GATCACAATTTTCGCTTTCATTTCTG	3.00383	V:19287561..19287579	-	AAATGAAAGCGAAAATTGT	19	0.163846	0.0545455
V:19731828..19731853	-	GAAGACTGTGTCGATCTGCTTCTTTC	3.11306	V:19731831..19731849	+	AGAAGCAGATCGACACAGT	19	0.163846	0.0526316
II:3309400..3309425	+	GGCTCCATCAATGTAAGGACAGAATT	3.2223	II:3309405..3309422	-	TCTGTCCTTACATTGATG	18	0.163846	0.0508475
II:3305276..3305301	+	GACTTCTCGTCTTTCAGGTTCCGTGC	3.2223	II:3305277..3305298	-	CGGAACCTGAAAGACGAGAAGT	22	0.163846	0.0508475
III:2429058..2429083	-	GAATCTTCTGCTCCATTCTATGTCAC	3.2223	III:2429061..2429080	+	ACATAGAATGGAGCAGAAGA	20	0.163846	0.0508475
V:18720621..18720646	+	GTTCCTCGTTTGGATATGTAGAAGAG	3.33153	V:18720626..18720643	-	TTCTACATATCCAAACGA	18	0.163846	0.0491803
III:3153266..3153291	-	GACGAAGAGGATATTGCAGTCTTGTG	3.33153	III:3153269..3153286	+	AAGACTGCAATATCCTCT	18	0.163846	0.0491803
III:3830876..3830901	+	GAATTCAATCAATAGACGATGCTGTC	3.38614	III:3830876..3830898	-	AGCATCGTCTATTGATTGAATTC	23	0.163846	0.0483871
II:3597846..3597871	-	GAGGAAATATTTTTCGTAAAAAACAA	4.47844	II:3597849..3597868	+	TTTTTTACGAAAAATATTTC	20	0.163846	0.0365854
III:3830721..3830746	+	GTCATCTTTTTCTTTTTTCCTCATAT	4.64229	III:3830725..3830743	-	TGAGGAAAAAAGAAAAAGA	19	0.163846	0.0352941
I:2149960..2149985	+	GTTGAAGTGGAAGAGTCTGAGTTCGG	4.80613	I:2149965..2149982	-	AACTCAGACTCTTCCACT	18	0.163846	0.0340909
V:19290855..19290880	+	GCTTTCCGTTGTCCGTGATGCTATAC	4.91537	V:19290858..19290877	-	TAGCATCACGGACAACGGAA	20	0.163846	0.0333333
V:17073819..17073844	-	GTGTGGGGTCGCATAGAGATCAACGC	5.07921	V:17073822..17073844	+	TTGATCTCTATGCGACCCCACAC	23	0.163846	0.0322581
I:2150033..2150058	+	GTTATCATGCGTCTCGGTGGTCCGAA	5.57075	I:2150035..2150055	-	GGACCACCGAGACGCATGATA	21	0.163846	0.0294118
II:3305216..3305241	+	GCTTCAAATTCAAGTTTCTTTTCTGC	5.73459	II:3305219..3305238	-	GAAAAGAAACTTGAATTTGA	20	0.163846	0.0285714
III:3830434..3830459	+	GCGATGGTTGGGTTGGGGTCCAAAAT	6.1169	III:3830439..3830456	-	TTGGACCCCAACCCAACC	18	0.163846	0.0267857
II:1820686..1820711	+	GTTTCGCGCTGTTTTGCCTGGTTTTT	6.33536	II:1820687..1820708	-	AACCAGGCAAAACAGCGCGAAA	22	0.163846	0.0258621
I:2150940..2150965	+	GCCACCACTCTATCGTTCACAAGGAT	6.38997	I:2150947..2150962	-	CTTGTGAACGATAGAG	16	0.163846	0.025641
I:2149952..2149977	+	GGTTCATTGTTGAAGTGGAAGAGTCT	6.88151	I:2149955..2149974	-	CTCTTCCACTTCAACAATGA	20	0.163846	0.0238095
V:17069824..17069849	-	GTTTAGTTCCATTAGCCAAAAACAGA	7.04536	V:17069827..17069847	+	GTTTTTGGCTAATGGAACTAA	21	0.163846	0.0232558
X:1957692..1957717	+	GGTTTGACTATCGTAGAAAATTGTAC	8.41074	X:1957695..1957714	-	CAATTTTCTACGATAGTCAA	20	0.163846	0.0194805
II:3304187..3304212	+	GTCAATTTTAACAAAGTGTCGAATGG	8.57458	II:3304192..3304209	-	TTCGACACTTTGTTAAAA	18	0.163846	0.0191083
II:13478675..13478700	-	GCAGCAAATGGCATTAATTGTTCGTC	9.39381	II:13478678..13478699	+	GAACAATTAATGCCATTTGCTG	22	0.163846	0.0174419
V:17539195..17539220	+	GAAGGTTGATAAAAACAGAAGATTGC	10.1038	V:17539197..17539217	-	ATCTTCTGTTTTTATCAACCT	21	0.163846	0.0162162
V:20380774..20380799	-	GATTTTTGAAATTGGCAAGTAACTGA	10.1584	V:20380777..20380794	+	GTTACTTGCCAATTTCAA	18	0.163846	0.016129
II:3302873..3302898	+	GGCGTGATCCGTGATGACGGTTGTTT	12.5615	II:3302877..3302895	-	CAACCGTCATCACGGATCA	19	0.163846	0.0130435
II:3373419..3373444	+	GAGTAATGCAAATGTTTAGGGATAAT	13.3261	II:3373424..3373441	-	ATCCCTAAACATTTGCAT	18	0.163846	0.0122951
V:18722248..18722273	+	GGCAAATTCCTGTATTGTCAGGTCTC	13.5446	V:18722252..18722270	-	ACCTGACAATACAGGAATT	19	0.163846	0.0120968
II:2502085..2502110	+	GTATTCTGAAAGTCTAATTGGTCTTG	13.5992	II:2502089..2502107	-	GACCAATTAGACTTTCAGA	19	0.163846	0.0120482
V:19290887..19290912	+	GACATTTCCAAAATTTCGAAGTAGTT	17.4222	V:19290891..19290909	-	TACTTCGAAATTTTGGAAA	19	0.163846	0.00940439
V:17073610..17073635	-	GTTTTCCCCATTTCTACAAGTTCATA	19.6615	V:17073613..17073632	+	GAACTTGTAGAAATGGGGAA	20	0.163846	0.00833333
I:13411707..13411732	+	GTTAATACAATTGATTAATACGAAAA	20.5353	I:13411709..13411729	-	TCGTATTAATCAATTGTATTA	21	0.163846	0.00797872
IV:15646963..15646988	+	GTTAATACAATTGATTAATACGAAAA	20.5353	IV:15646965..15646985	-	TCGTATTAATCAATTGTATTA	21	0.163846	0.00797872
IV:15647096..15647121	+	GTCATAAATGTGATGGAGAATGATTG	21.3545	IV:15647099..15647118	-	TCATTCTCCATCACATTTAT	20	0.163846	0.00767263
II:3306684..3306709	+	GCTCTTTTTGCTATCATCTTACTTGG	21.4638	II:3306688..3306706	-	AGTAAGATGATAGCAAAAA	19	0.163846	0.00763359
V:19732060..19732085	-	GTTCGGGCTCCGTTATATGATAGGAA	25.2322	V:19732063..19732082	+	CTATCATATAACGGAGCCCG	20	0.163846	0.00649351
V:20384070..20384095	-	GAAAACGCTTCGAATAGTTATTCAAT	25.2322	V:20384073..20384090	+	GAATAACTATTCGAAGCG	18	0.163846	0.00649351
II:2136888..2136913	+	GAAGATCCAGTGATATTGTCCGATCT	27.7991	II:2136892..2136910	-	TCGGACAATATCACTGGAT	19	0.163846	0.00589391
V:19290830..19290855	+	GTTGTTGGATAATTGAATTATTCCGG	32.0045	V:19290834..19290852	-	GAATAATTCAATTATCCAA	19	0.163846	0.00511945
II:3291638..3291663	-	GAGCACCAGTGTCAGCTGGAATGTTA	39.596	II:3291641..3291657	+	CATTCCAGCTGACACTG	17	0.163846	0.00413793
IV:3579021..3579046	-	GATTGGAATCGTTCCTGTTGAGATTG	48.116	IV:3579024..3579042	+	TCTCAACAGGAACGATTCC	19	0.163846	0.00340522
V:17073331..17073356	-	GATCTCGTTCCAATTCAACTCCAGAC	4.25998	V:17073334..17073354	+	TGGAGTTGAATTGGAACGAGA	21	0.140439	0.032967
X:1405850..1405875	-	GATAAGAATGAACTTTATTATATGAA	1.85692	X:1405853..1405871	+	ATATAATAAAGTTCATTCT	19	0.136538	0.0735294
X:16951965..16951990	+	GATAAGAATGAACTTTATTATATGAA	1.85692	X:16951969..16951987	-	ATATAATAAAGTTCATTCT	19	0.136538	0.0735294
I:13409891..13409916	+	GTGTGGTTGATGTTTATTGAATAATA	55.6529	I:13409894..13409913	-	TATTCAATAAACATCAACCA	20	0.136538	0.00245339
I:13412435..13412460	+	GTCTTGAGCTTGCAACATCTGTAATC	1.03769	I:13412438..13412457	-	TACAGATGTTGCAAGCTCAA	20	0.10923	0.105263
III:1371254..1371279	-	GGCACGGCAGTTATGGCACATTCGAA	1.03769	III:1371257..1371277	+	GAATGTGCCATAACTGCCGTG	21	0.10923	0.105263
II:2094675..2094700	+	GAGGAAACTTGGCAATAGCTTTAATA	1.03769	II:2094680..2094697	-	TAAAGCTATTGCCAAGTT	18	0.10923	0.105263
V:18722294..18722319	+	GTTTTTACTGTCCAGCATAGTTCGAC	1.0923	V:18722294..18722316	-	GAACTATGCTGGACAGTAAAAAC	23	0.10923	0.1
V:17073441..17073466	-	GTTGTGAACCCGATCCTTTGTCTTTG	1.0923	V:17073444..17073461	+	AGACAAAGGATCGGGTTC	18	0.10923	0.1
I:13409976..13410001	+	GGGTCACTCGCACTCGTTATTGGAAT	1.0923	I:13409975..13409998	-	CCAATAACGAGTGCGAGTGACCCT	24	0.10923	0.1
IV:15647464..15647489	+	GAAGTTGGCTCATAATATTCGATTGC	1.0923	IV:15647466..15647486	-	ATCGAATATTATGAGCCAACT	21	0.10923	0.1
I:2149911..2149936	+	GTCTTCTTATGATGGCTGCCTCGATG	1.14692	I:2149915..2149933	-	CGAGGCAGCCATCATAAGA	19	0.10923	0.0952381
IV:16347430..16347455	-	GTACATCACCAACAAATTTTTTTTTA	1.14692	IV:16347433..16347455	+	AAAAAAATTTGTTGGTGATGTAC	23	0.10923	0.0952381
I:13412066..13412091	+	GCTGAGCAATGAAATGGTGGATTCTT	1.14692	I:13412069..13412088	-	AATCCACCATTTCATTGCTC	20	0.10923	0.0952381
V:19291160..19291185	+	GCGTAAGAATTAGGCATGTCTCTTAA	1.14692	V:19291161..19291182	-	AGAGACATGCCTAATTCTTACG	22	0.10923	0.0952381
V:19480251..19480276	-	GAAGTTTGCCCTGCAGATGGAACACA	1.14692	V:19480254..19480274	+	GTTCCATCTGCAGGGCAAACT	21	0.10923	0.0952381
II:13478033..13478058	-	GTGAGTTGGCATTTTGCGGATTCTAT	1.20153	II:13478036..13478055	+	GAATCCGCAAAATGCCAACT	20	0.10923	0.0909091
III:3830842..3830867	+	GCCGTATTGTTGAGAAAGTGGCTTGC	1.20153	III:3830844..3830864	-	AGCCACTTTCTCAACAATACG	21	0.10923	0.0909091
X:1978001..1978026	-	GACAAAAATAAGGTAGAGATTAAAAG	1.20153	X:1978004..1978026	+	TTAATCTCTACCTTATTTTTGTC	23	0.10923	0.0909091
I:2150751..2150776	+	GACAAGCCCTCGAGCACACCGATCAA	1.25615	I:2150752..2150773	-	ATCGGTGTGCTCGAGGGCTTGT	22	0.10923	0.0869565
X:1980706..1980731	-	GGGAGGCAATTGACCATAGTTAGGAA	1.31076	X:1980709..1980731	+	CTAACTATGGTCAATTGCCTCCC	23	0.10923	0.0833333
II:2681521..2681546	+	GGCAAGGTTGAGACTCAAATGACCGT	1.31076	II:2681526..2681543	-	GTCATTTGAGTCTCAACC	18	0.10923	0.0833333
V:17159086..17159111	+	GCATTTATTGCGAAAAATTCTTTTAA	1.31076	V:17159090..17159108	-	AAAGAATTTTTCGCAATAA	19	0.10923	0.0833333
I:11825055..11825080	+	GATAAAGGTACGTTGCAAACACTCCC	1.31076	I:11825057..11825077	-	AGTGTTTGCAACGTACCTTTA	21	0.10923	0.0833333
II:2091797..2091822	+	GACAAACATCCATCACATTCTTCGGT	1.31076	II:2091800..2091819	-	GAAGAATGTGATGGATGTTT	20	0.10923	0.0833333
V:20380708..20380733	-	GTTTACTCCCACTTGTACCACTGGTA	1.36538	V:20380711..20380728	+	CAGTGGTACAAGTGGGAG	18	0.10923	0.08
II:3306453..3306478	+	GTGCGGAACAAGTGAAACGGAATCGC	1.36538	II:3306457..3306475	-	ATTCCGTTTCACTTGTTCC	19	0.10923	0.08
V:17073795..17073820	-	GCTAGCTGTGTTCCTTTTTTCAAAAA	1.36538	V:17073798..17073817	+	TTGAAAAAAGGAACACAGCT	20	0.10923	0.08
V:19290731..19290756	+	GTTTTGGAAATGGAATCTCCTTCTTG	1.41999	V:19290735..19290753	-	GAAGGAGATTCCATTTCCA	19	0.10923	0.0769231
IV:15650296..15650321	+	GACATCCTGTTTGAACGACGCGATTC	1.47461	IV:15650297..15650318	-	TCGCGTCGTTCAAACAGGATGT	22	0.10923	0.0740741
V:18280113..18280138	+	GAAACTAACAATGTTATTTAAATGTC	1.52922	V:18280113..18280135	-	ATTTAAATAACATTGTTAGTTTC	23	0.10923	0.0714286
V:19290540..19290565	+	GAAGATATACGGTATTTATTTTTTTT	1.63846	V:19290544..19290562	-	AAAAATAAATACCGTATAT	19	0.10923	0.0666667
IV:17217211..17217236	-	GAACGTGATTTTTTCGTTTGAAATTT	1.63846	IV:17217214..17217232	+	TTTCAAACGAAAAAATCAC	19	0.10923	0.0666667
IV:15648078..15648103	+	GTACTCCTCTCACTATAGCGACTTTT	1.69307	IV:15648079..15648100	-	AGTCGCTATAGTGAGAGGAGTA	22	0.10923	0.0645161
V:18711581..18711606	-	GCTTCTTGCTCGATCTTGTCGTTTAA	1.69307	V:18711584..18711602	+	AACGACAAGATCGAGCAAG	19	0.10923	0.0645161
V:17159115..17159140	+	GCACGGAAATCGATGCAGAATCGCCA	1.69307	V:17159118..17159137	-	CGATTCTGCATCGATTTCCG	20	0.10923	0.0645161
II:3373639..3373664	+	GTTTTTGGGGTTATTAATGAGATTAC	1.74769	II:3373642..3373661	-	ATCTCATTAATAACCCCAAA	20	0.10923	0.0625
I:13410256..13410281	+	GATGAGCTTTACTGTTTCTTGTGACC	1.74769	I:13410258..13410278	-	CACAAGAAACAGTAAAGCTCA	21	0.10923	0.0625
I:2150162..2150187	+	GTGTTGAAAGATCACCTAGACGGGCC	1.8023	I:2150163..2150184	-	CCGTCTAGGTGATCTTTCAACA	22	0.10923	0.0606061
V:20384208..20384233	-	GTAGATATCGTGTATGAGGTTTCACA	1.85692	V:20384211..20384231	+	GAAACCTCATACACGATATCT	21	0.10923	0.0588235
X:17254090..17254115	-	GGAAAATATCAAGGATGTAAGGTTTG	1.85692	X:17254093..17254111	+	ACCTTACATCCTTGATATT	19	0.10923	0.0588235
IV:15649908..15649933	+	GTGCGCATTTCAGAGTGACATTGATC	1.91153	IV:15649909..15649930	-	CAATGTCACTCTGAAATGCGCA	22	0.10923	0.0571429
X:16952231..16952256	+	GGCAATATCATTGTGAGCTCGGTTGC	1.91153	X:16952231..16952253	-	ACCGAGCTCACAATGATATTGCC	23	0.10923	0.0571429
III:3829647..3829672	+	GATCTGTTTCTCTCGTGCTGATTGTC	1.91153	III:3829651..3829669	-	AATCAGCACGAGAGAAACA	19	0.10923	0.0571429
X:1976565..1976590	-	GAAATGTATGCTTTATCCACTTTAAA	1.91153	X:1976568..1976589	+	AAAGTGGATAAAGCATACATTT	22	0.10923	0.0571429
II:3291630..3291655	-	GTGTCAGCTGGAATGTTAGAATCTCC	1.96615	II:3291633..3291654	+	GATTCTAACATTCCAGCTGACA	22	0.10923	0.0555556
X:1976486..1976511	-	GGCGACATACCAACACCAATTATAAT	1.96615	X:1976489..1976510	+	ATAATTGGTGTTGGTATGTCGC	22	0.10923	0.0555556
III:3830359..3830384	+	GCATCCCCCCTCCTGTGGAAGTAGAG	1.96615	III:3830362..3830381	-	TACTTCCACAGGAGGGGGGA	20	0.10923	0.0555556
II:13478060..13478085	-	GAAAGCTTTCGTTCCGTTGTTAATAT	1.96615	II:13478063..13478082	+	TTAACAACGGAACGAAAGCT	20	0.10923	0.0555556
X:1780308..1780333	-	GAAAAAATTTTTGATCTGCTTCATAT	1.96615	X:1780311..1780333	+	TGAAGCAGATCAAAAATTTTTTC	23	0.10923	0.0555556
V:18720742..18720767	+	GTTTCACCAATCGGACGATGTTTTTT	2.12999	V:18720743..18720764	-	AAACATCGTCCGATTGGTGAAA	22	0.10923	0.0512821
X:17254115..17254140	-	GACGGAGGTTGGCTCATGAGAAGTCG	2.12999	X:17254118..17254137	+	CTTCTCATGAGCCAACCTCC	20	0.10923	0.0512821
I:13411351..13411376	+	GATTCATAACCCGTTGGAATGTAAGT	2.23922	I:13411354..13411373	-	TACATTCCAACGGGTTATGA	20	0.10923	0.0487805
III:1371231..1371256	-	GAATGACATTAGGGTTTCTTCTATCG	2.23922	III:1371234..1371253	+	TAGAAGAAACCCTAATGTCA	20	0.10923	0.0487805
IV:17220449..17220474	-	GTTACCGCATAGGCGGGTTTCAGTGG	2.34845	IV:17220452..17220468	+	CTGAAACCCGCCTATGC	17	0.10923	0.0465116
II:3314420..3314445	+	GACTTTTAAAATGATTTATTTCCCGC	2.34845	II:3314424..3314442	-	GGAAATAAATCATTTTAAA	19	0.10923	0.0465116
III:1381574..1381599	-	GAAGGTTATTCGGCAAATGCGGGCCA	2.34845	III:1381577..1381596	+	CCCGCATTTGCCGAATAACC	20	0.10923	0.0465116
II:2136739..2136764	+	GTCCAGAGGCATATGAGCATTTCGTG	2.40307	II:2136744..2136761	-	GAAATGCTCATATGCCTC	18	0.10923	0.0454545
II:1820542..1820567	+	GGTCTGGTGAGTATTTCCAATTTTTT	2.40307	II:1820547..1820564	-	AAATTGGAAATACTCACC	18	0.10923	0.0454545
I:13411866..13411891	+	GCAAGCATAGTGGATTTGGTCGATGC	2.40307	I:13411866..13411888	-	TCGACCAAATCCACTATGCTTGC	23	0.10923	0.0454545
IV:15647129..15647154	+	GCAAGCATAGTGGATTTGGTCGATGC	2.40307	IV:15647129..15647151	-	TCGACCAAATCCACTATGCTTGC	23	0.10923	0.0454545
IV:4071493..4071518	-	GATTTTTCCTGGCATGTTGAAAGCAT	2.40307	IV:4071496..4071517	+	CTTTCAACATGCCAGGAAAAAT	22	0.10923	0.0454545
V:19287332..19287357	+	GGTTTTCCTTCTTCCGTGTTGATAAA	2.45768	V:19287336..19287354	-	ATCAACACGGAAGAAGGAA	19	0.10923	0.0444444
II:3596810..3596835	-	GATGGTTTTTATTTATTGTTAAAGAA	2.5123	II:3596813..3596833	+	TTTAACAATAAATAAAAACCA	21	0.10923	0.0434783
IV:4071478..4071503	-	GTTGAAAGCATCGGTCAATTGTTGTG	2.56691	IV:4071481..4071499	+	AACAATTGACCGATGCTTT	19	0.10923	0.0425532
V:20380954..20380979	-	GAAGTCTGTTCCCAACAACATTTCGG	2.56691	V:20380957..20380973	+	AAATGTTGTTGGGAACA	17	0.10923	0.0425532
IV:4071796..4071821	-	GAACTCTTTATATGTTTATTATTGCT	2.56691	IV:4071799..4071817	+	AATAATAAACATATAAAGA	19	0.10923	0.0425532
V:17069672..17069697	-	GGTGGCTAGCCGAGACGTTGCATGTG	2.67614	V:17069675..17069694	+	ATGCAACGTCTCGGCTAGCC	20	0.10923	0.0408163
V:4660435..4660460	+	GCTTTGTTCGCAGGTACGGGATGTCC	2.67614	V:4660437..4660457	-	CATCCCGTACCTGCGAACAAA	21	0.10923	0.0408163
III:2428582..2428607	-	GTGATTGCAATCAGTATATCGTCCTG	2.73076	III:2428585..2428606	+	GACGATATACTGATTGCAATCA	22	0.10923	0.04
II:2681637..2681662	+	GAAACCTCCACGGAACCATTTCTGAG	2.83999	II:2681637..2681659	-	AGAAATGGTTCCGTGGAGGTTTC	23	0.10923	0.0384615
II:13477969..13477994	-	GGTATACCGGTTATTAGTGCCATTTT	2.8946	II:13477972..13477988	+	ATGGCACTAATAACCGG	17	0.10923	0.0377358
II:13477859..13477884	-	GCATTCACTTTCCGAGGTTCGTGTAA	2.94922	II:13477862..13477884	+	CACGAACCTCGGAAAGTGAATGC	23	0.10923	0.037037
V:19287387..19287412	+	GGCATGTGTTTCTTGATTGAAATTTT	3.00383	V:19287390..19287409	-	ATTTCAATCAAGAAACACAT	20	0.10923	0.0363636
I:13410336..13410361	+	GAGTTTCCACTGTCTTTTCTTTTGTC	3.2223	I:13410336..13410358	-	AAAAGAAAAGACAGTGGAAACTC	23	0.10923	0.0338983
I:13411761..13411786	+	GTAAGTCGTATTAGTTCTGAAAAATT	3.33153	I:13411764..13411783	-	TTTTCAGAACTAATACGACT	20	0.10923	0.0327869
X:1976408..1976433	-	GGATACATCCGATCAAAAAATTTGAC	3.33153	X:1976411..1976433	+	AAATTTTTTGATCGGATGTATCC	23	0.10923	0.0327869
V:17073381..17073406	-	GAATCCATCGATCCATCCCGATTCAT	3.44076	V:17073384..17073401	+	AATCGGGATGGATCGATG	18	0.10923	0.031746
IV:17220684..17220709	-	GATAGAATAGAATGAGAGCTCATACC	3.6046	IV:17220687..17220706	+	ATGAGCTCTCATTCTATTCT	20	0.10923	0.030303
V:19732094..19732119	-	GGGGGTATATATGGGTTCTAAGATCA	3.65922	V:19732097..19732116	+	TCTTAGAACCCATATATACC	20	0.10923	0.0298507
II:2502110..2502135	+	GCTTCAAAATTATAGTAACTTCTCAT	3.82306	II:2502113..2502132	-	AGAAGTTACTATAATTTTGA	20	0.10923	0.0285714
X:17237758..17237783	+	GATTCGTAATGGTAAAGGTAAGGAAA	3.82306	X:17237759..17237780	-	CCTTACCTTTACCATTACGAAT	22	0.10923	0.0285714
I:472278..472303	-	GAGTAGTCTGATAGAGTGGTATAGAT	3.98691	I:472281..472302	+	TATACCACTCTATCAGACTACT	22	0.10923	0.0273973
IV:15860704..15860729	+	GTATTATCAGAGTACAGTGTCATATC	4.04152	IV:15860706..15860726	-	ATGACACTGTACTCTGATAAT	21	0.10923	0.027027
IV:4071439..4071464	-	GGTCTGCACTTTGAGAATCAAGGCCT	4.25998	IV:4071442..4071460	+	CCTTGATTCTCAAAGTGCA	19	0.10923	0.025641
IV:17217254..17217279	-	GTAGTAGGAAATCCACAGTTTTCGCA	4.64229	IV:17217257..17217277	+	GAAAACTGTGGATTTCCTACT	21	0.10923	0.0235294
X:1958893..1958918	+	GTTCCAAACTGTTGCACATTCTAGAG	4.75152	X:1958896..1958915	-	TAGAATGTGCAACAGTTTGG	20	0.10923	0.0229885
II:2091491..2091516	+	GTAGAAGGATTCATCTGGCATTTCAT	4.75152	II:2091496..2091513	-	AAATGCCAGATGAATCCT	18	0.10923	0.0229885
IV:15861224..15861249	+	GGTGGTAGATCACAGAGATTGTCGAT	4.75152	IV:15861230..15861246	-	GACAATCTCTGTGATCT	17	0.10923	0.0229885
II:3373637..3373662	+	GTGTTTTTGGGGTTATTAATGAGATT	4.86075	II:3373640..3373659	-	CTCATTAATAACCCCAAAAA	20	0.10923	0.0224719
V:18723185..18723210	+	GATTTTCTTCTTTTCCATTGTTCCTC	4.91537	V:18723188..18723207	-	GAACAATGGAAAAGAAGAAA	20	0.10923	0.0222222
IV:16347370..16347395	-	GATAAATTAGATGATCATGACGGTCA	4.91537	IV:16347373..16347391	+	CCGTCATGATCATCTAATT	19	0.10923	0.0222222
IV:15647404..15647429	+	GGCTTGTCGTAGTTTTCGTTGTACCA	4.96998	IV:15647408..15647426	-	TACAACGAAAACTACGACA	19	0.10923	0.021978
II:3306826..3306851	+	GTGCATATTCGTTTAATTGGGCCACT	5.29767	II:3306830..3306848	-	GGCCCAATTAAACGAATAT	19	0.10923	0.0206186
I:13410313..13410338	+	GTCCTTGACCAGTTTTTCCATTGGAG	5.51613	I:13410317..13410335	-	CAATGGAAAAACTGGTCAA	19	0.10923	0.019802
V:17073804..17073829	-	GAGATCAACGCTAGCTGTGTTCCTTT	5.95305	V:17073807..17073825	+	GGAACACAGCTAGCGTTGA	19	0.10923	0.0183486
II:13478050..13478075	-	GTTCCGTTGTTAATATAGTGAGTTGG	6.38997	II:13478053..13478072	+	ACTCACTATATTAACAACGG	20	0.10923	0.017094
II:13477846..13477871	-	GAGGTTCGTGTAAACACTTTTTTAAA	6.66305	II:13477849..13477869	+	AAAAAAGTGTTTACACGAACC	21	0.10923	0.0163934
I:11825082..11825107	+	GGCAATTAGTGGACATCTGATAGTGG	6.93613	I:11825087..11825104	-	CTATCAGATGTCCACTAA	18	0.10923	0.015748
II:3373449..3373474	+	GGATTAGGATTTGAGGATTAAGAATA	7.15459	II:3373448..3373471	-	TCTTAATCCTCAAATCCTAATCCT	24	0.10923	0.0152672
V:17069675..17069700	-	GTAGGTGGCTAGCCGAGACGTTGCAT	7.26382	V:17069678..17069699	+	CAACGTCTCGGCTAGCCACCTA	22	0.10923	0.0150376
II:13477820..13477845	-	GGACCATCCGGATGCTTCATGTTTCA	8.02843	II:13477823..13477842	+	AACATGAAGCATCCGGATGG	20	0.10923	0.0136054
III:3153348..3153373	-	GATTGACTTAGGATTGGAAAAAACTA	8.46535	III:3153351..3153372	+	TTTTTTCCAATCCTAAGTCAAT	22	0.10923	0.0129032
II:3373271..3373296	+	GCACAAGTTGTATGAGAGAATAAATG	8.6292	II:3373276..3373293	-	TTATTCTCTCATACAACT	18	0.10923	0.0126582
II:2502137..2502162	+	GGGTAAAAATATATAAAAACGGTTTC	9.33919	II:2502136..2502159	-	ACCGTTTTTATATATTTTTACCCA	24	0.10923	0.0116959
IV:3578806..3578831	-	GAGGCAATTTGGGTCAATGACGGAGT	9.7215	IV:3578809..3578826	+	CCGTCATTGACCCAAATT	18	0.10923	0.011236
IV:17220398..17220423	-	GTGAACAAATGATCCAATAAGAACAA	9.93996	IV:17220401..17220423	+	TTCTTATTGGATCATTTGTTCAC	23	0.10923	0.010989
I:2149936..2149961	+	GGGCGATTTCGCTTGTGGTTCATTGT	10.65	I:2149936..2149958	-	ATGAACCACAAGCGAAATCGCCC	23	0.10923	0.0102564
V:20380798..20380823	-	GGTTGGGTCCAGATCTTTCAGATTGA	11.0869	V:20380801..20380819	+	ATCTGAAAGATCTGGACCC	19	0.10923	0.00985222
III:3830873..3830898	+	GTTGAATTCAATCAATAGACGATGCT	11.2507	III:3830875..3830895	-	ATCGTCTATTGATTGAATTCA	21	0.10923	0.00970874
IV:15647381..15647406	+	GAATCTCCTCGTCGAAATCAAAAGGC	12.3976	IV:15647382..15647403	-	TTTTGATTTCGACGAGGAGATT	22	0.10923	0.00881057
III:2295221..2295246	-	GTTATCCGTTCTAATTGGTCAATTGT	13.7084	III:2295224..2295245	+	ATTGACCAATTAGAACGGATAA	22	0.10923	0.00796813
IV:4071642..4071667	-	GTATCCAACAATTTTGTCATTGCCGC	15.6746	IV:4071645..4071667	+	GCAATGACAAAATTGTTGGATAC	23	0.10923	0.00696864
X:1976053..1976078	-	GTTACTTTTTTCGTTCTATGTGAGTA	16.4938	X:1976056..1976074	+	TCACATAGAACGAAAAAAG	19	0.10923	0.00662252
I:11824814..11824839	+	GAAGTAAGTTGAAAATAACAATAGAT	17.2038	I:11824816..11824836	-	TATTGTTATTTTCAACTTACT	21	0.10923	0.00634921
V:18720738..18720763	+	GTTGGTTTCACCAATCGGACGATGTT	20.4261	V:18720741..18720760	-	ATCGTCCGATTGGTGAAACC	20	0.10923	0.00534759
IV:17217205..17217230	-	GATTTTTTCGTTTGAAATTTCTTGAA	24.0307	IV:17217208..17217228	+	AAGAAATTTCAAACGAAAAAA	21	0.10923	0.00454545
II:1820301..1820326	+	GTGAGTCACAATTGAATTATCGAATT	25.1776	II:1820305..1820323	-	TCGATAATTCAATTGTGAC	19	0.10923	0.00433839
V:17069475..17069500	-	GCGGTCCAGTGATCGAGCAATATAAG	26.3245	V:17069478..17069498	+	ATATTGCTCGATCACTGGACC	21	0.10923	0.00414938
II:3309373..3309398	+	GCTGTTTTCGGTAAAAATTCTTGCTT	26.543	II:3309377..3309395	-	CAAGAATTTTTACCGAAAA	19	0.10923	0.00411523
IV:14937738..14937763	-	GCATTGGTTGTTAATAGTGATTGATA	32.0045	IV:14937741..14937762	+	CAATCACTATTAACAACCAATG	22	0.10923	0.00341297
II:3373847..3373872	+	GGTTCCGGGTTGAAAAAAATGTTTTC	36.756	II:3373851..3373869	-	AACATTTTTTTCAACCCGG	19	0.10923	0.00297177
IV:14937729..14937754	-	GTTAATAGTGATTGATAATATTAGAA	40.0875	IV:14937732..14937750	+	TAATATTATCAATCACTAT	19	0.10923	0.0027248
X:17253865..17253890	-	GCCTGATAATTGGAAAAGATTGATAA	44.0198	X:17253868..17253889	+	TCAATCTTTTCCAATTATCAGG	22	0.10923	0.00248139
I:11824790..11824815	+	GAATGTCTCGGGAGTAACTTTATTGA	46.6414	I:11824793..11824812	-	ATAAAGTTACTCCCGAGACA	20	0.10923	0.00234192
I:2150262..2150287	+	GTAAGCATGGGGCGGAAATTTTGCAT	47.9521	I:2150262..2150284	-	CAAAATTTCCGCCCCATGCTTAC	23	0.10923	0.0022779
V:20384161..20384186	-	GTTGCAGATAACTGGTACAAGGATTA	57.5644	V:20384164..20384182	+	TCCTTGTACCAGTTATCTG	19	0.10923	0.00189753
V:18722275..18722300	+	GGTGTTGGTAACTTCAAATGTTTTTA	706.393	V:18722278..18722297	-	AAACATTTGAAGTTACCAAC	20	0.10923	0.000154631
II:3373607..3373632	+	GAATTTTTTTTACTTTTTCAGATTTT	1.74769	II:3373610..3373629	-	ATCTGAAAAAGTAAAAAAAA	20	0.0910253	0.0520833
V:19731486..19731511	-	GCTTCTGTTCATTGAGTTTTCTATTA	2.56691	V:19731489..19731508	+	TAGAAAACTCAATGAACAGA	20	0.0819228	0.0319149
X:16329527..16329552	-	GCTTCTGTTCATTGAGTTTTCTATTA	2.56691	X:16329530..16329549	+	TAGAAAACTCAATGAACAGA	20	0.0819228	0.0319149
II:2136681..2136706	+	GCAAGATGGAAAAGTTTGAGATTCCG	12.9984	II:2136687..2136703	-	AATCTCAAACTTTTCCA	17	0.0819228	0.00630252
III:3830658..3830683	+	GTTTTTCTTGTCATCGTCCATCAGTC	1.03769	III:3830658..3830680	-	TGATGGACGATGACAAGAAAAAC	23	0.0546152	0.0526316
II:3373696..3373721	+	GTTTTCCCGCGACGGCAACTTTTCCT	1.03769	II:3373698..3373718	-	AAAAGTTGCCGTCGCGGGAAA	21	0.0546152	0.0526316
II:3304139..3304164	+	GGTTTGTTCGCTGTGATGTCCAGTAG	1.03769	II:3304143..3304161	-	CTGGACATCACAGCGAACA	19	0.0546152	0.0526316
II:2501906..2501931	+	GGGGATTGTTCAGTTTCAAAAAAAAA	1.03769	II:2501909..2501928	-	TTTTTTGAAACTGAACAATC	20	0.0546152	0.0526316
V:17069397..17069422	-	GGGGATAAGAGCTCGTCCGATGGCGT	1.03769	V:17069400..17069422	+	CCATCGGACGAGCTCTTATCCCC	23	0.0546152	0.0526316
V:18720489..18720514	+	GCTTTTACATACTTCATAAACCGAAA	1.03769	V:18720491..18720511	-	CGGTTTATGAAGTATGTAAAA	21	0.0546152	0.0526316
V:17312054..17312079	+	GCTAGAATGAACAACATAGTATGGAA	1.03769	V:17312060..17312076	-	CATACTATGTTGTTCAT	17	0.0546152	0.0526316
IV:15650348..15650373	+	GCGTCTTCTCCAGAAGGGTGGGTGAG	1.03769	IV:15650353..15650370	-	ACCCACCCTTCTGGAGAA	18	0.0546152	0.0526316
X:16902714..16902739	+	GATTTTTTTCGTATCCAAGGTATAGA	1.03769	X:16902714..16902736	-	ATACCTTGGATACGAAAAAAATC	23	0.0546152	0.0526316
IV:4071427..4071452	-	GAGAATCAAGGCCTTCAAAATGAGTT	1.03769	IV:4071430..4071448	+	TCATTTTGAAGGCCTTGAT	19	0.0546152	0.0526316
IV:8597942..8597967	-	GACTTCATGGTATTTCAGTCCTGCAC	1.03769	IV:8597945..8597964	+	CAGGACTGAAATACCATGAA	20	0.0546152	0.0526316
II:2503643..2503668	+	GTTTATTGAGCAGAAAAAATATTGAG	1.0923	II:2503647..2503665	-	AATATTTTTTCTGCTCAAT	19	0.0546152	0.05
V:19290862..19290887	+	GTTGTCCGTGATGCTATACAACTTCG	1.0923	V:19290865..19290884	-	AGTTGTATAGCATCACGGAC	20	0.0546152	0.05
IV:17220247..17220272	-	GTTGGGAGTTTATCAAAATCTTCGTT	1.0923	IV:17220250..17220270	+	GAAGATTTTGATAAACTCCCA	21	0.0546152	0.05
I:472338..472363	-	GTGTAGTATCCAGTACAGACAACAAT	1.0923	I:472341..472360	+	GTTGTCTGTACTGGATACTA	20	0.0546152	0.05
X:16952243..16952268	+	GTGAGCTCGGTTGCGCTGCTCCAGTA	1.0923	X:16952246..16952265	-	TGGAGCAGCGCAACCGAGCT	20	0.0546152	0.05
V:17069692..17069717	-	GGAGCCCGGTGTTGTACGTAGGTGGC	1.0923	V:17069695..17069713	+	ACCTACGTACAACACCGGG	19	0.0546152	0.05
IV:3578697..3578722	-	GAATTGGGCAGCCATTATAACACTAT	1.0923	IV:3578700..3578719	+	GTGTTATAATGGCTGCCCAA	20	0.0546152	0.05
III:2429029..2429054	-	GAATTCCGTCGCGCCATCCCCTCAAG	1.0923	III:2429032..2429051	+	GAGGGGATGGCGCGACGGAA	20	0.0546152	0.05
IV:15646482..15646507	-	GTCTAACTGTCTGCGTATCTAGCTGC	1.11051	IV:15646485..15646503	+	GCTAGATACGCAGACAGTT	19	0.0546152	0.0491803
IV:3578765..3578790	-	GTCTAACTGTCTGCGTATCTAGCTGC	1.11051	IV:3578768..3578786	+	GCTAGATACGCAGACAGTT	19	0.0546152	0.0491803
IV:15647939..15647964	+	GTCTAACTGTCTGCGTATCTAGCTGC	1.11051	IV:15647943..15647961	-	GCTAGATACGCAGACAGTT	19	0.0546152	0.0491803
X:15820564..15820589	-	GTCATGTTGCTCCGACTGCTTTTTGC	1.14692	X:15820567..15820588	+	AAAAGCAGTCGGAGCAACATGA	22	0.0546152	0.047619
II:13477982..13478007	-	GTATTTCGAATTCGGTATACCGGTTA	1.14692	II:13477985..13478002	+	CCGGTATACCGAATTCGA	18	0.0546152	0.047619
II:2094739..2094764	+	GTATCCTAGGAACTTGATCTTTGCGT	1.14692	II:2094744..2094761	-	CAAAGATCAAGTTCCTAG	18	0.0546152	0.047619
II:3373421..3373446	+	GTAATGCAAATGTTTAGGGATAATAT	1.14692	II:3373421..3373443	-	TTATCCCTAAACATTTGCATTAC	23	0.0546152	0.047619
II:1820440..1820465	+	GGCGATAATGATATCCTCTTCTATGT	1.14692	II:1820445..1820462	-	TAGAAGAGGATATCATTA	18	0.0546152	0.047619
II:13479187..13479212	-	GCATATAACAAAGTAGAATGATTCAG	1.14692	II:13479190..13479207	+	AATCATTCTACTTTGTTA	18	0.0546152	0.047619
X:17253882..17253907	-	GATTTTTTGTCTTTATTGCCTGATAA	1.14692	X:17253885..17253907	+	TCAGGCAATAAAGACAAAAAATC	23	0.0546152	0.047619
II:3596590..3596615	-	GACGATACTAGCGTTACATTCTCCTC	1.14692	II:3596593..3596611	+	GAGAATGTAACGCTAGTAT	19	0.0546152	0.047619
IV:15860764..15860789	+	GAATTGCCATCAGAATCTGTTGTATG	1.14692	IV:15860768..15860786	-	ACAACAGATTCTGATGGCA	19	0.0546152	0.047619
IV:16346987..16347012	-	GTAAATTCACCTATTGATTTCCGATA	1.20153	IV:16346990..16347011	+	CGGAAATCAATAGGTGAATTTA	22	0.0546152	0.0454545
V:17073519..17073544	-	GGAAAACCAGCATCCGGCGCAAGTGC	1.20153	V:17073522..17073544	+	CTTGCGCCGGATGCTGGTTTTCC	23	0.0546152	0.0454545
IV:15860150..15860175	+	GATAAAACACTTTTATAGAAACTTGG	1.20153	IV:15860152..15860172	-	AGTTTCTATAAAAGTGTTTTA	21	0.0546152	0.0454545
X:17237994..17238019	+	GAGAGCGAGAATTTAGGTATCCGGTA	1.20153	X:17237994..17238016	-	CGGATACCTAAATTCTCGCTCTC	23	0.0546152	0.0454545
V:17069725..17069750	-	GAAATCAACAGTGCAGGCTCCACCGC	1.20153	V:17069728..17069748	+	GTGGAGCCTGCACTGTTGATT	21	0.0546152	0.0454545
II:3306741..3306766	+	GTTGCTTGGATAATAAATACTCTGTG	1.25615	II:3306746..3306763	-	AGAGTATTTATTATCCAA	18	0.0546152	0.0434783
X:1795306..1795331	-	GTGTTTTGGAATGGTTTTTCCTATAG	1.25615	X:1795309..1795328	+	TAGGAAAAACCATTCCAAAA	20	0.0546152	0.0434783
III:3149059..3149084	-	GTGATTCCGCAAAGTTCGACTGCCTA	1.25615	III:3149062..3149083	+	GCAGTCGAACTTTGCGGAATCA	22	0.0546152	0.0434783
V:17069131..17069156	-	GTATTAGTGTTGGTGGGAGTGGTTTT	1.25615	V:17069134..17069153	+	ACCACTCCCACCAACACTAA	20	0.0546152	0.0434783
V:17073495..17073520	-	GCGACATAAAGGGAACAGTATGGTAG	1.25615	V:17073498..17073519	+	CCATACTGTTCCCTTTATGTCG	22	0.0546152	0.0434783
V:18784775..18784800	-	GCATCAAATGTTCAAGTAGACGGCTA	1.25615	V:18784778..18784800	+	CCGTCTACTTGAACATTTGATGC	23	0.0546152	0.0434783
IV:8598582..8598607	-	GATTATTCGTATGTTATCCAACAAAA	1.25615	IV:8598585..8598603	+	TGTTGGATAACATACGAAT	19	0.0546152	0.0434783
III:2427268..2427293	-	GACTACATATGTCTTGTAAAAGATGG	1.25615	III:2427271..2427287	+	TCTTTTACAAGACATAT	17	0.0546152	0.0434783
V:17073308..17073333	-	GACCGTCGTGTGTTCTTTTTGGAGAT	1.25615	V:17073311..17073330	+	TCCAAAAAGAACACACGACG	20	0.0546152	0.0434783
V:17315670..17315695	+	GTTGAAAAAACAGAAGATTGAGCCTT	1.31076	V:17315675..17315692	-	GCTCAATCTTCTGTTTTT	18	0.0546152	0.0416667
IV:3579241..3579266	-	GTTAAAGAATACTTTTTTTTGGCAAT	1.31076	IV:3579244..3579261	+	GCCAAAAAAAAGTATTCT	18	0.0546152	0.0416667
II:2502025..2502050	+	GCAACAGCTTCTTTGCAATGTGTTTA	1.31076	II:2502027..2502047	-	ACACATTGCAAAGAAGCTGTT	21	0.0546152	0.0416667
V:19290743..19290768	+	GAATCTCCTTCTTGGTCCTAATAATA	1.31076	V:19290747..19290765	-	TATTAGGACCAAGAAGGAG	19	0.0546152	0.0416667
V:18280285..18280310	+	GAAAAATTCCGGGTCCGCTACCAAAA	1.31076	V:18280289..18280307	-	TGGTAGCGGACCCGGAATT	19	0.0546152	0.0416667
V:20380694..20380719	-	GTACCACTGGTAATCTTCCTCTGTTG	1.36538	V:20380697..20380718	+	CAGAGGAAGATTACCAGTGGTA	22	0.0546152	0.04
V:17069473..17069498	-	GGTCCAGTGATCGAGCAATATAAGTA	1.36538	V:17069476..17069498	+	TTATATTGCTCGATCACTGGACC	23	0.0546152	0.04
II:3306362..3306387	+	GGTAAAAATTCTTCTCATGTGGCCTC	1.36538	II:3306362..3306384	-	GCCACATGAGAAGAATTTTTACC	23	0.0546152	0.04
I:12641166..12641191	+	GGCTTTTTCGACGTCAGCTAATATGA	1.36538	I:12641168..12641188	-	TATTAGCTGACGTCGAAAAAG	21	0.0546152	0.04
V:18280044..18280069	+	GCTTTATCTGAGATCATGGAAATCCG	1.36538	V:18280044..18280066	-	ATTTCCATGATCTCAGATAAAGC	23	0.0546152	0.04
V:17073557..17073582	-	GCAACTTGACCGTGTTGATCCAAAAA	1.36538	V:17073560..17073579	+	TTGGATCAACACGGTCAAGT	20	0.0546152	0.04
II:3310459..3310484	+	GATCCCCTTAGCTCGCGGAATTATTT	1.36538	II:3310465..3310481	-	TAATTCCGCGAGCTAAG	17	0.0546152	0.04
IV:14937357..14937382	-	GAGCCTCCCGATAGAATGAATTTTCA	1.36538	IV:14937360..14937379	+	AAATTCATTCTATCGGGAGG	20	0.0546152	0.04
X:17238948..17238973	+	GACGATCAGTTTTTTTTCGGAATCTC	1.36538	X:17238949..17238970	-	ATTCCGAAAAAAAACTGATCGT	22	0.0546152	0.04
II:3310723..3310748	+	GAAGTTTGAACCACTATCGGACATCA	1.36538	II:3310729..3310745	-	TGTCCGATAGTGGTTCA	17	0.0546152	0.04
IV:17216869..17216894	-	GAAGCGTAGTATTCCCCGCACTGTGT	1.36538	IV:17216872..17216889	+	CAGTGCGGGGAATACTAC	18	0.0546152	0.04
IV:15647326..15647351	+	GTGAATTTAATCATGGATTCTGTCAG	1.41999	IV:15647327..15647348	-	ACAGAATCCATGATTAAATTCA	22	0.0546152	0.0384615
V:18737350..18737375	+	GTCATTTCTTCAACATTCTGAAAGCG	1.41999	V:18737354..18737372	-	TTTCAGAATGTTGAAGAAA	19	0.0546152	0.0384615
X:17238669..17238694	+	GGTACTTAGCTCTGGGCAGGCAGCAC	1.41999	X:17238669..17238691	-	CTGCCTGCCCAGAGCTAAGTACC	23	0.0546152	0.0384615
IV:14937632..14937657	-	GGCCGATGCGGGGAAAGTGTACACGT	1.41999	IV:14937635..14937652	+	TGTACACTTTCCCCGCAT	18	0.0546152	0.0384615
IV:14936774..14936799	+	GGCCGATGCGGGGAAAGTGTACACGT	1.41999	IV:14936779..14936796	-	TGTACACTTTCCCCGCAT	18	0.0546152	0.0384615
II:13478141..13478166	-	GATAGTACATATGATATCTTGAAAAA	1.41999	II:13478144..13478165	+	TTCAAGATATCATATGTACTAT	22	0.0546152	0.0384615
V:20380645..20380670	-	GTTCGGTATTGGATACTCTTTATCCA	1.47461	V:20380648..20380669	+	ATAAAGAGTATCCAATACCGAA	22	0.0546152	0.037037
II:3303378..3303403	+	GTCTAAATTCCAGAGTCAGTACTTGC	1.47461	II:3303378..3303400	-	AGTACTGACTCTGGAATTTAGAC	23	0.0546152	0.037037
X:17254139..17254164	-	GGTGGAGTCTGATAGAAAAAAAATGA	1.47461	X:17254142..17254164	+	TTTTTTTTCTATCAGACTCCACC	23	0.0546152	0.037037
V:18776629..18776654	+	GCTCTTTTTCGGTTGATGATTGCATG	1.47461	V:18776633..18776651	-	GCAATCATCAACCGAAAAA	19	0.0546152	0.037037
I:13412468..13412493	+	GAAGCCAAAATGGATCCACTCTGTGA	1.47461	I:13412472..13412490	-	CAGAGTGGATCCATTTTGG	19	0.0546152	0.037037
II:3310726..3310751	+	GTTTGAACCACTATCGGACATCATGC	1.52922	II:3310729..3310748	-	TGATGTCCGATAGTGGTTCA	20	0.0546152	0.0357143
IV:17217196..17217221	-	GTTTGAAATTTCTTGAAACATCTCCA	1.52922	IV:17217199..17217219	+	AGATGTTTCAAGAAATTTCAA	21	0.0546152	0.0357143
I:13410410..13410435	+	GTTGGATCTCCGTCCATTGACTCTTC	1.52922	I:13410413..13410432	-	GAGTCAATGGACGGAGATCC	20	0.0546152	0.0357143
II:2502062..2502087	+	GACATAGCTGGTGTTAATAAAAAGTA	1.52922	II:2502066..2502084	-	TTTTTATTAACACCAGCTA	19	0.0546152	0.0357143
X:17254089..17254114	-	GAAAATATCAAGGATGTAAGGTTTGA	1.52922	X:17254092..17254109	+	AACCTTACATCCTTGATA	18	0.0546152	0.0357143
V:18280170..18280195	+	GTTTTTCACAATTCCAAATTCGATGT	1.58384	V:18280170..18280192	-	TCGAATTTGGAATTGTGAAAAAC	23	0.0546152	0.0344828
II:3373680..3373705	+	GTTGTTATAGTCAGCTGTTTTCCCGC	1.58384	II:3373682..3373702	-	GGAAAACAGCTGACTATAACA	21	0.0546152	0.0344828
V:18711635..18711660	-	GTATATCAACGTCTCGTCTTTCCACT	1.58384	V:18711638..18711656	+	GGAAAGACGAGACGTTGAT	19	0.0546152	0.0344828
V:20384064..20384089	-	GCTTCGAATAGTTATTCAATTTCGCC	1.58384	V:20384067..20384088	+	GAAATTGAATAACTATTCGAAG	22	0.0546152	0.0344828
I:11808604..11808629	+	GCAAATCTGCTTCGAATTCGTTTTGC	1.58384	I:11808609..11808626	-	AAACGAATTCGAAGCAGA	18	0.0546152	0.0344828
II:13473574..13473599	-	GTGTCACAAACTACGTCTTTTTCTTG	1.63846	II:13473577..13473598	+	GAAAAAGACGTAGTTTGTGACA	22	0.0546152	0.0333333
I:11825200..11825225	+	GGCAGAGCAGACATCGATTGTTATTC	1.63846	I:11825203..11825222	-	TAACAATCGATGTCTGCTCT	20	0.0546152	0.0333333
II:1820438..1820463	+	GCGGCGATAATGATATCCTCTTCTAT	1.63846	II:1820440..1820460	-	GAAGAGGATATCATTATCGCC	21	0.0546152	0.0333333
X:1976457..1976482	-	GATAAGCGTGGCGGCGTGAGTTTCGA	1.63846	X:1976460..1976478	+	AAACTCACGCCGCCACGCT	19	0.0546152	0.0333333
I:2150843..2150868	+	GACGTGTTCCAGCATTCTTCGACCGC	1.63846	I:2150845..2150865	-	GTCGAAGAATGCTGGAACACG	21	0.0546152	0.0333333
II:13478666..13478691	-	GGCATTAATTGTTCGTCACATGCATT	1.69307	II:13478669..13478691	+	GCATGTGACGAACAATTAATGCC	23	0.0546152	0.0322581
IV:14773811..14773836	+	GGATGATGGCGTGGAAGGGTCCGGTT	1.69307	IV:14773814..14773833	-	CGGACCCTTCCACGCCATCA	20	0.0546152	0.0322581
I:11809624..11809649	+	GAGTTCTTTATTCATGTGCTAGCGAA	1.69307	I:11809628..11809646	-	GCTAGCACATGAATAAAGA	19	0.0546152	0.0322581
X:1976707..1976732	-	GAATTTCGTTATACTACATCTTCTTT	1.69307	X:1976710..1976731	+	GAAGATGTAGTATAACGAAATT	22	0.0546152	0.0322581
V:17073844..17073869	-	GTTTGAATCACCATAATGAGCCGTTG	1.74769	V:17073847..17073868	+	CGGCTCATTATGGTGATTCAAA	22	0.0546152	0.03125
I:11808718..11808743	+	GTTTCTTCACGGACGATAGATAAAAT	1.74769	I:11808723..11808740	-	TTATCTATCGTCCGTGAA	18	0.0546152	0.03125
II:3310487..3310512	+	GGAACAGATGAAGTGTTTTAGGAATC	1.74769	II:3310489..3310509	-	TCCTAAAACACTTCATCTGTT	21	0.0546152	0.03125
III:1374729..1374754	-	GCATTAAATAATATCCATAAGTTCTG	1.74769	III:1374732..1374751	+	AACTTATGGATATTATTTAA	20	0.0546152	0.03125
X:17253749..17253774	-	GATAATTCAATAATACCAAATTTGAT	1.74769	X:17253752..17253773	+	AAATTTGGTATTATTGAATTAT	22	0.0546152	0.03125
V:19731825..19731850	-	GACTGTGTCGATCTGCTTCTTTCCAC	1.74769	V:19731828..19731845	+	GAAAGAAGCAGATCGACA	18	0.0546152	0.03125
V:20380685..20380710	-	GTAATCTTCCTCTGTTGTTCTTGTGT	1.8023	V:20380688..20380707	+	CAAGAACAACAGAGGAAGAT	20	0.0546152	0.030303
I:2150239..2150264	+	GCCGAATGTTTGAATCCAAAAAAGTA	1.8023	I:2150241..2150261	-	TTTTTTGGATTCAAACATTCG	21	0.0546152	0.030303
IV:15648160..15648185	+	GTAGATTTCCTCACTGTCAAAGTATA	1.85692	IV:15648165..15648182	-	ACTTTGACAGTGAGGAAA	18	0.0546152	0.0294118
X:17254104..17254129	-	GCTCATGAGAAGTCGGAAAATATCAA	1.85692	X:17254107..17254128	+	ATATTTTCCGACTTCTCATGAG	22	0.0546152	0.0294118
X:1779666..1779691	-	GATCACAGATAATTCATATTTAGTCG	1.85692	X:1779669..1779688	+	CTAAATATGAATTATCTGTG	20	0.0546152	0.0294118
II:2502220..2502245	+	GAGCCGGATGACGAGAGTATTGCTTA	1.85692	II:2502224..2502242	-	GCAATACTCTCGTCATCCG	19	0.0546152	0.0294118
I:2150915..2150940	+	GAGCATCTCCTCGAGAGTGTTGGCAG	1.85692	I:2150919..2150937	-	CCAACACTCTCGAGGAGAT	19	0.0546152	0.0294118
II:3373300..3373325	+	GAATAAAGATGAAGTATAATAAGATA	1.85692	II:3373305..3373322	-	CTTATTATACTTCATCTT	18	0.0546152	0.0294118
I:13412700..13412725	+	GAAATCCAACGTGGTATAGATAGGAT	1.85692	I:13412701..13412722	-	CTATCTATACCACGTTGGATTT	22	0.0546152	0.0294118
IV:8598394..8598419	-	GTTGTCCATTGTTTTTATTGATCTGC	1.91153	IV:8598397..8598417	+	GATCAATAAAAACAATGGACA	21	0.0546152	0.0285714
II:2091743..2091768	+	GTCAGTTCAGATCGTAGTTGATCCAC	1.91153	II:2091745..2091765	-	GATCAACTACGATCTGAACTG	21	0.0546152	0.0285714
V:18776299..18776324	+	GTACGCGAATCTGAATGTAACTTGCA	1.91153	V:18776301..18776321	-	AAGTTACATTCAGATTCGCGT	21	0.0546152	0.0285714
X:16952415..16952440	+	GCTCTGCGATTGGTCATGCGCGACTC	1.91153	X:16952418..16952437	-	TCGCGCATGACCAATCGCAG	20	0.0546152	0.0285714
IV:4071667..4071692	-	GAACTATAAGGTTTGAATGACTGCTG	1.91153	IV:4071670..4071688	+	CAGTCATTCAAACCTTATA	19	0.0546152	0.0285714
I:13412040..13412065	+	GACGGCAAATGTTCTTGTTTGCCCAA	1.96615	I:13412047..13412062	-	GGCAAACAAGAACATT	16	0.0546152	0.0277778
X:1980899..1980924	-	GTCATTCGCCGTTTTTTATTACAAAT	2.02076	X:1980902..1980921	+	TGTAATAAAAAACGGCGAAT	20	0.0546152	0.027027
I:11808300..11808325	+	GGAGTGAAATAGATTTATTGATTTAC	2.02076	I:11808304..11808322	-	AATCAATAAATCTATTTCA	19	0.0546152	0.027027
IV:16347038..16347063	-	GGAGCATCCTAGATCCTGGAGCTTGC	2.02076	IV:16347041..16347061	+	AGCTCCAGGATCTAGGATGCT	21	0.0546152	0.027027
X:17238780..17238805	+	GTCAAATCAAGTACGATTGGCTGGCG	2.07538	X:17238784..17238802	-	CAGCCAATCGTACTTGATT	19	0.0546152	0.0263158
I:13411738..13411763	+	GCATTTGCTGGTTCAGCCAAGGAGTA	2.07538	I:13411739..13411760	-	TCCTTGGCTGAACCAGCAAATG	22	0.0546152	0.0263158
III:3841201..3841226	-	GAGTTGGTACAATTTTATAAATTTAA	2.10268	III:3841204..3841223	+	AATTTATAAAATTGTACCAA	20	0.0546152	0.025974
IV:4196132..4196157	+	GAGTTGGTACAATTTTATAAATTTAA	2.10268	IV:4196135..4196154	-	AATTTATAAAATTGTACCAA	20	0.0546152	0.025974
II:2503578..2503603	+	GTCCCCTCTTGGATGGTTAGGGACTA	2.12999	II:2503582..2503600	-	TCCCTAACCATCCAAGAGG	19	0.0546152	0.025641
V:19290720..19290745	+	GCTTGCTCCTCGTTTTGGAAATGGAA	2.12999	V:19290724..19290742	-	CATTTCCAAAACGAGGAGC	19	0.0546152	0.025641
III:2295351..2295376	-	GTTTTATTATATTTATTATGTTTTGA	2.18461	III:2295354..2295375	+	AAACATAATAAATATAATAAAA	22	0.0546152	0.025
V:17073858..17073883	-	GGACGAGGAGAGATGTTTGAATCACC	2.18461	V:17073861..17073880	+	GATTCAAACATCTCTCCTCG	20	0.0546152	0.025
X:17253985..17254010	-	GGAAGTCGAGGAGCCAAATATGACGA	2.18461	X:17253988..17254010	+	TCATATTTGGCTCCTCGACTTCC	23	0.0546152	0.025
IV:14937428..14937453	-	GTGTAAAATAATGGAAAACATATGTT	2.23922	IV:14937431..14937452	+	ATATGTTTTCCATTATTTTACA	22	0.0546152	0.0243902
X:1402890..1402915	-	GGAGACCAGACACGGTGGCACTTGAA	2.23922	X:1402893..1402915	+	AAGTGCCACCGTGTCTGGTCTCC	23	0.0546152	0.0243902
IV:3578825..3578850	-	GGAGAAGCAGGCACACATTGAGGCAA	2.23922	IV:3578828..3578850	+	CCTCAATGTGTGCCTGCTTCTCC	23	0.0546152	0.0243902
X:16902607..16902632	+	GTTTTCTTAACTTGATTGCGTTCATA	2.29384	X:16902608..16902629	-	GAACGCAATCAAGTTAAGAAAA	22	0.0546152	0.0238095
I:2150780..2150805	+	GTTGAATCTTGCTCGGCGAATTTCTT	2.29384	I:2150786..2150802	-	AAATTCGCCGAGCAAGA	17	0.0546152	0.0238095
X:17238154..17238179	+	GCCTTGATTTGTCCGCACATATTCGA	2.29384	X:17238154..17238176	-	AATATGTGCGGACAAATCAAGGC	23	0.0546152	0.0238095
V:17073470..17073495	-	GAACTGGAAAGTCGAGTTGTCCACAA	2.29384	V:17073473..17073491	+	TGGACAACTCGACTTTCCA	19	0.0546152	0.0238095
I:13409944..13409969	+	GGAAAAGAGTTGAGGGTGTTCAGTCT	2.34845	I:13409949..13409966	-	CTGAACACCCTCAACTCT	18	0.0546152	0.0232558
X:1975974..1975999	-	GCTCGAACATCTAATCGTTGTAGCTC	2.34845	X:1975977..1975998	+	CTACAACGATTAGATGTTCGAG	22	0.0546152	0.0232558
X:17254201..17254226	-	GCAATATGAAAATTCGGGGAATTCGG	2.34845	X:17254204..17254224	+	AATTCCCCGAATTTTCATATT	21	0.0546152	0.0232558
V:19731976..19732001	-	GTTTGAATGCGGTGTCGAGAATGATT	2.40307	V:19731979..19731998	+	CATTCTCGACACCGCATTCA	20	0.0546152	0.0227273
V:18720561..18720586	+	GTTCCTCTTACGGATGTAGAAGAAGA	2.40307	V:18720562..18720583	-	TCTTCTACATCCGTAAGAGGAA	22	0.0546152	0.0227273
III:3153145..3153170	-	GGCGATTTCGTTCGGGCTTGTGTCTT	2.40307	III:3153148..3153165	+	ACACAAGCCCGAACGAAA	18	0.0546152	0.0227273
X:16952274..16952299	+	GCTCGATTTTTGAACCATTCCGCTGT	2.40307	X:16952277..16952296	-	GCGGAATGGTTCAAAAATCG	20	0.0546152	0.0227273
X:1958658..1958683	+	GATAGTTCACTTGATCAAGGATGTTG	2.40307	X:1958662..1958680	-	CATCCTTGATCAAGTGAAC	19	0.0546152	0.0227273
IV:15860680..15860705	+	GACTTGATTTTAGAAGTGACGGATGT	2.40307	IV:15860684..15860702	-	TCCGTCACTTCTAAAATCA	19	0.0546152	0.0227273
V:19287308..19287333	+	GTTGTTGGATAATTGAATGATTCCGG	2.5123	V:19287310..19287330	-	GAATCATTCAATTATCCAACA	21	0.0546152	0.0217391
IV:15647007..15647032	+	GTTCAGCCAAGAGTAAGTCGTTTTAG	2.5123	IV:15647011..15647029	-	AAACGACTTACTCTTGGCT	19	0.0546152	0.0217391
V:18721007..18721032	+	GATTCTACTCGAAGACTTCTTGAATC	2.56691	V:18721007..18721029	-	TCAAGAAGTCTTCGAGTAGAATC	23	0.0546152	0.0212766
III:1371133..1371158	-	GTCTGGTTTAATCGTTGAGTTTTTAA	2.62153	III:1371136..1371154	+	AAAACTCAACGATTAAACC	19	0.0546152	0.0208333
X:1780438..1780463	-	GATGACTAATCGAGATGTATTGTCCA	2.67614	X:1780441..1780462	+	ACAATACATCTCGATTAGTCAT	22	0.0546152	0.0204082
IV:17217277..17217302	-	GAGGCTCCTACAAAGTACAATTGGTA	2.67614	IV:17217280..17217299	+	CAATTGTACTTTGTAGGAGC	20	0.0546152	0.0204082
IV:3897160..3897185	-	GAGCATTTGAGCGAAGGGATGGTCTA	2.67614	IV:3897163..3897181	+	ACCATCCCTTCGCTCAAAT	19	0.0546152	0.0204082
II:2503489..2503514	+	GCAAAACCAGTATTTGATATTAACGA	2.78537	II:2503488..2503511	-	TTAATATCAAATACTGGTTTTGCC	24	0.0546152	0.0196078
X:17254158..17254183	-	GAAGGGAAAACTGTATTACGGTGGAG	2.78537	X:17254161..17254179	+	CACCGTAATACAGTTTTCC	19	0.0546152	0.0196078
V:17158729..17158754	+	GCCAAGATCCAGAATACTCAGGTTGT	2.83999	V:17158733..17158751	-	ACCTGAGTATTCTGGATCT	19	0.0546152	0.0192308
II:2094888..2094913	+	GAACAGATATGGTGACTTTTGTTGAC	2.83999	II:2094892..2094910	-	AACAAAAGTCACCATATCT	19	0.0546152	0.0192308
II:3303340..3303365	+	GTTTCGTTTGTTCGTTCTACCGTTTC	2.8946	II:3303343..3303362	-	ACGGTAGAACGAACAAACGA	20	0.0546152	0.0188679
II:2091494..2091519	+	GAAGGATTCATCTGGCATTTCATCAA	2.8946	II:2091494..2091516	-	ATGAAATGCCAGATGAATCCTTC	23	0.0546152	0.0188679
II:1820416..1820441	+	GTCTTCTAAAAGGTTGGAAATTGCGG	2.94922	II:1820420..1820438	-	CAATTTCCAACCTTTTAGA	19	0.0546152	0.0185185
X:17253518..17253543	-	GCAAAACTCTCTCTACGTGACTCTGT	2.94922	X:17253521..17253541	+	GAGTCACGTAGAGAGAGTTTT	21	0.0546152	0.0185185
V:19731654..19731679	-	GATGATAATGAGTCGTGTCGTGACGC	2.94922	V:19731657..19731677	+	TCACGACACGACTCATTATCA	21	0.0546152	0.0185185
V:19732179..19732204	-	GAGAAGAATATTTATCAAAACTTAAA	2.94922	V:19732182..19732200	+	AAGTTTTGATAAATATTCT	19	0.0546152	0.0185185
IV:14773690..14773715	+	GTTGGGGGAAAGATCAATCAATCAAT	3.00383	IV:14773695..14773712	-	GATTGATTGATCTTTCCC	18	0.0546152	0.0181818
II:3303373..3303398	+	GTTCCGTCTAAATTCCAGAGTCAGTA	3.00383	II:3303373..3303395	-	TGACTCTGGAATTTAGACGGAAC	23	0.0546152	0.0181818
V:18720741..18720766	+	GGTTTCACCAATCGGACGATGTTTTT	3.00383	V:18720745..18720763	-	AACATCGTCCGATTGGTGA	19	0.0546152	0.0181818
I:2150185..2150210	+	GCCCCATTTGCCTCAAAATTTGATTG	3.00383	I:2150188..2150207	-	TCAAATTTTGAGGCAAATGG	20	0.0546152	0.0181818
X:17253964..17253989	-	GACGATTGAAATCCTAAGTAGAGGAA	3.00383	X:17253967..17253985	+	CTCTACTTAGGATTTCAAT	19	0.0546152	0.0181818
II:2681649..2681674	+	GAACCATTTCTGAGAAGTCCCAGTGC	3.05845	II:2681652..2681671	-	CTGGGACTTCTCAGAAATGG	20	0.0546152	0.0178571
IV:14773612..14773637	+	GTTTTATAAGATTAATGGCAAGGGGG	3.11306	IV:14773616..14773634	-	CCTTGCCATTAATCTTATA	19	0.0546152	0.0175439
II:3309325..3309350	+	GACTATCGTGAAGGACAATCTGGTAT	3.11306	II:3309329..3309347	-	CCAGATTGTCCTTCACGAT	19	0.0546152	0.0175439
I:13410230..13410255	+	GAATTTTTGTTTATGAATTGTTCCTT	3.11306	I:13410233..13410252	-	GAACAATTCATAAACAAAAA	20	0.0546152	0.0175439
X:1958562..1958587	+	GAATCGAGCTGTCGGTTACGTGTGGT	3.11306	X:1958564..1958584	-	ACACGTAACCGACAGCTCGAT	21	0.0546152	0.0175439
II:3596578..3596603	-	GTTACATTCTCCTCAGTTGCTGTTTC	3.16768	II:3596581..3596599	+	ACAGCAACTGAGGAGAATG	19	0.0546152	0.0172414
III:3830303..3830328	+	GAGAAAATATGTTTATCTAAGAGAGA	3.2223	III:3830305..3830325	-	CTCTTAGATAAACATATTTTC	21	0.0546152	0.0169492
V:20380661..20380686	-	GTAGGATGGTGTTAATGTTCGGTATT	3.27691	V:20380664..20380683	+	ACCGAACATTAACACCATCC	20	0.0546152	0.0166667
V:19731630..19731655	-	GCAGATGAATGCCTGATATTTCAATC	3.27691	V:19731633..19731653	+	TGAAATATCAGGCATTCATCT	21	0.0546152	0.0166667
I:2150246..2150271	+	GTTTGAATCCAAAAAAGTAAGCATGG	3.33153	I:2150253..2150268	-	TGCTTACTTTTTTGGA	16	0.0546152	0.0163934
II:13479114..13479139	-	GCCAGAAACCGTTGATTACATGTACA	3.38614	II:13479117..13479137	+	ACATGTAATCAACGGTTTCTG	21	0.0546152	0.016129
V:19291172..19291197	+	GGCATGTCTCTTAATAGAAATATTCA	3.54999	V:19291175..19291194	-	ATATTTCTATTAAGAGACAT	20	0.0546152	0.0153846
V:19494654..19494679	-	GCAAACTATTGGTAGTTGGAACAATG	3.6046	V:19494657..19494675	+	TGTTCCAACTACCAATAGT	19	0.0546152	0.0151515
II:13478129..13478154	-	GATATCTTGAAAAAATCCAAAGCTTT	3.6046	II:13478132..13478150	+	GCTTTGGATTTTTTCAAGA	19	0.0546152	0.0151515
V:17315647..17315672	+	GTTTCTAAGTTTATTTTCCGATGGTT	3.71383	V:17315651..17315669	-	CATCGGAAAATAAACTTAG	19	0.0546152	0.0147059
II:2136711..2136736	+	GAAACGGTAGATTATTTTCAATCGCA	3.76845	II:2136713..2136733	-	GATTGAAAATAATCTACCGTT	21	0.0546152	0.0144928
V:18736790..18736815	+	GTGTGCCTATCCAATATTTATTGTCG	3.82306	V:18736792..18736812	-	CAATAAATATTGGATAGGCAC	21	0.0546152	0.0142857
II:2094582..2094607	+	GCTTGAGGTGTGGAACAACAAATTTT	3.87768	II:2094587..2094604	-	ATTTGTTGTTCCACACCT	18	0.0546152	0.0140845
IV:4071279..4071304	-	GAGAATTTCGGAATGTTCGTTTGAAT	4.04152	IV:4071282..4071304	+	CAAACGAACATTCCGAAATTCTC	23	0.0546152	0.0135135
X:17254026..17254051	-	GACAAGCTCTCACTGCAATTCACGGG	4.04152	X:17254029..17254048	+	GTGAATTGCAGTGAGAGCTT	20	0.0546152	0.0135135
X:16952370..16952395	+	GTACAGATCAAACTTCTTGACGTTTC	4.09614	X:16952373..16952392	-	ACGTCAAGAAGTTTGATCTG	20	0.0546152	0.0133333
I:11824888..11824913	+	GGTAGAACAATGGGGACGATAACTGT	4.09614	I:11824888..11824910	-	GTTATCGTCCCCATTGTTCTACC	23	0.0546152	0.0133333
II:13473496..13473521	-	GCGTGATTCTTCTCGACAAACTGGTA	4.15075	II:13473499..13473520	+	CAGTTTGTCGAGAAGAATCACG	22	0.0546152	0.0131579
V:19287190..19287215	+	GCGTCTGCGGAAATGTTCTTCTACTG	4.15075	V:19287194..19287212	-	TAGAAGAACATTTCCGCAG	19	0.0546152	0.0131579
IV:16347477..16347502	-	GTTTCTGATTATTAGTGTTGTTCACA	4.20537	IV:16347480..16347501	+	GAACAACACTAATAATCAGAAA	22	0.0546152	0.012987
IV:14937655..14937680	-	GCGTTTTTATTATTCAAATCACTGGC	4.20537	IV:14937658..14937679	+	AGTGATTTGAATAATAAAAACG	22	0.0546152	0.012987
II:2681518..2681543	+	GATGGCAAGGTTGAGACTCAAATGAC	4.20537	II:2681521..2681540	-	ATTTGAGTCTCAACCTTGCC	20	0.0546152	0.012987
V:19731645..19731670	-	GAGTCGTGTCGTGACGCAGATGAATG	4.25998	V:19731648..19731665	+	TCATCTGCGTCACGACAC	18	0.0546152	0.0128205
IV:14937706..14937731	-	GAATATATGTTGATTATTTTTAGGCG	4.25998	IV:14937709..14937728	+	CTAAAAATAATCAACATATA	20	0.0546152	0.0128205
X:16952422..16952447	+	GATTGGTCATGCGCGACTCAATCGCA	4.42383	X:16952424..16952444	-	GATTGAGTCGCGCATGACCAA	21	0.0546152	0.0123457
IV:17216969..17216994	-	GCCATCTGCCCATTGTGGCGCACAGG	4.47844	IV:17216972..17216993	+	GTGCGCCACAATGGGCAGATGG	22	0.0546152	0.0121951
III:3830817..3830842	+	GAGGAGCTTGGTCTTTATATGGCTAG	4.47844	III:3830823..3830839	-	GCCATATAAAGACCAAG	17	0.0546152	0.0121951
IV:14773635..14773660	+	GGGAGGGATGCGAAATAAATATTTTA	4.96998	IV:14773637..14773657	-	AATATTTATTTCGCATCCCTC	21	0.0546152	0.010989
V:17069155..17069180	-	GCTTTGTTCCGGACAGAGAGCGCAGT	5.0246	V:17069158..17069177	+	GCGCTCTCTGTCCGGAACAA	20	0.0546152	0.0108696
II:2502031..2502056	+	GCTTCTTTGCAATGTGTTTATTTTGA	5.07921	II:2502034..2502053	-	AAATAAACACATTGCAAAGA	20	0.0546152	0.0107527
V:17069701..17069726	-	GCTCGTGGCGGAGCCCGGTGTTGTAC	5.07921	V:17069704..17069722	+	CAACACCGGGCTCCGCCAC	19	0.0546152	0.0107527
IV:3579080..3579105	-	GTTTTAAAAGACTTGGGGATTCCATC	5.18844	IV:3579083..3579104	+	GGAATCCCCAAGTCTTTTAAAA	22	0.0546152	0.0105263
V:20383756..20383781	-	GCTGGATGTTGTTAATGAATTTGATG	5.18844	V:20383759..20383779	+	CAAATTCATTAACAACATCCA	21	0.0546152	0.0105263
IV:15646997..15647022	+	GCATTTGCTGGTTCAGCCAAGAGTAA	5.18844	IV:15646999..15647019	-	CTCTTGGCTGAACCAGCAAAT	21	0.0546152	0.0105263
I:2150005..2150030	+	GTAGCGTCTGCGGAAGTGGTCTTCTA	5.24306	I:2150006..2150027	-	AAGACCACTTCCGCAGACGCTA	22	0.0546152	0.0104167
I:472463..472488	-	GGTAGACGTCGTCAAATGCATAGTTT	5.24306	I:472466..472488	+	CTATGCATTTGACGACGTCTACC	23	0.0546152	0.0104167
I:13410382..13410407	+	GTCTTCTTCAGCTTTTGTTATGTCTT	5.35229	I:13410386..13410404	-	ACATAACAAAAGCTGAAGA	19	0.0546152	0.0102041
II:3304179..3304204	+	GCAACATTGTCAATTTTAACAAAGTG	5.62536	II:3304182..3304201	-	TTTGTTAAAATTGACAATGT	20	0.0546152	0.00970874
IV:14937658..14937683	-	GTAGCGTTTTTATTATTCAAATCACT	5.67998	IV:14937661..14937681	+	GATTTGAATAATAAAAACGCT	21	0.0546152	0.00961538
IV:14937698..14937723	-	GTTGATTATTTTTAGGCGGTATGAGA	5.73459	IV:14937701..14937724	+	CATACCGCCTAAAAATAATCAACA	24	0.0546152	0.00952381
II:2094761..2094786	+	GCGTGTCCAAAATTGGATTTTTCCAT	5.73459	II:2094762..2094783	-	GAAAAATCCAATTTTGGACACG	22	0.0546152	0.00952381
II:3303425..3303450	+	GTGTTGACTCTGTTTTCGGTGGTTTC	5.95305	II:3303426..3303447	-	ACCACCGAAAACAGAGTCAACA	22	0.0546152	0.00917431
IV:4071691..4071716	-	GAGTGAATAGTAAACAATAGAACTGA	6.22613	IV:4071694..4071713	+	GTTCTATTGTTTACTATTCA	20	0.0546152	0.00877193
II:3291505..3291530	-	GGAACGGGCAAGACTTATTATATTCA	6.36267	II:3291508..3291527	+	ATATAATAAGTCTTGCCCGT	20	0.0546152	0.00858369
II:3311254..3311279	+	GGAACGGGCAAGACTTATTATATTCA	6.36267	II:3311257..3311276	-	ATATAATAAGTCTTGCCCGT	20	0.0546152	0.00858369
V:20380814..20380839	-	GAGCTTGTAGTTGATAGGTTGGGTCC	6.99074	V:20380817..20380836	+	CCCAACCTATCAACTACAAG	20	0.0546152	0.0078125
X:1779916..1779941	-	GTTTAATCGACATCGTTGCAATGCTA	7.48228	X:1779919..1779939	+	CATTGCAACGATGTCGATTAA	21	0.0546152	0.00729927
II:3310547..3310572	+	GCGGATAGGAAAATGTATATGAAAGT	7.70074	II:3310550..3310569	-	TTCATATACATTTTCCTATC	20	0.0546152	0.0070922
III:2295245..2295270	-	GCATTTTTCCACTGATCCAAATGAGT	7.9192	III:2295248..2295270	+	CATTTGGATCAGTGGAAAAATGC	23	0.0546152	0.00689655
II:3304132..3304157	+	GTAAATCGGTTTGTTCGCTGTGATGT	8.51997	II:3304132..3304154	-	TCACAGCGAACAAACCGATTTAC	23	0.0546152	0.00641026
III:2233799..2233824	-	GCATTTTTCCATTGATCCAAATGAGT	8.68381	III:2233802..2233823	+	CATTTGGATCAATGGAAAAATG	22	0.0546152	0.00628931
X:16952112..16952137	+	GCTTCGGCGTGCTTATTGAGAGCTTC	8.73843	X:16952113..16952134	-	GCTCTCAATAAGCACGCCGAAG	22	0.0546152	0.00625
V:19290936..19290961	+	GTTTCCCATCCATCAATTATGGAGTC	9.39381	V:19290939..19290958	-	TCCATAATTGATGGATGGGA	20	0.0546152	0.00581395
IV:15647723..15647748	+	GCAGTTTTTCCAAAGTAAAAACGTGA	9.61227	IV:15647727..15647745	-	CGTTTTTACTTTGGAAAAA	19	0.0546152	0.00568182
II:3373395..3373420	+	GGTTATTAGGAGAGAACAATTTGAGA	9.83073	II:3373400..3373417	-	CAAATTGTTCTCTCCTAA	18	0.0546152	0.00555556
V:18720913..18720938	+	GCTTAGAGTGCCTGGACCAAGGGTCT	10.0492	V:18720916..18720935	-	CCCTTGGTCCAGGCACTCTA	20	0.0546152	0.00543478
X:17254129..17254154	-	GATAGAAAAAAAATGACGGAGGTTGG	10.2677	X:17254132..17254150	+	ACCTCCGTCATTTTTTTTC	19	0.0546152	0.00531915
X:17237638..17237663	+	GAAAATACAAGATAATAGCAAATTGG	10.2677	X:17237638..17237660	-	ATTTGCTATTATCTTGTATTTTC	23	0.0546152	0.00531915
II:2091641..2091666	+	GTACAGCACCAAAATCTAATCATAAA	10.3769	II:2091642..2091663	-	ATGATTAGATTTTGGTGCTGTA	22	0.0546152	0.00526316
X:1780441..1780466	-	GTAGATGACTAATCGAGATGTATTGT	10.4861	X:1780444..1780466	+	ATACATCTCGATTAGTCATCTAC	23	0.0546152	0.00520833
I:11810518..11810543	+	GATCTTATTGATCGTGTTGATTTTTC	10.5953	I:11810519..11810540	-	AAATCAACACGATCAATAAGAT	22	0.0546152	0.00515464
II:3373330..3373355	+	GGTTTTGGATATTAGGATATTTTGTG	10.8684	II:3373333..3373352	-	AAAATATCCTAATATCCAAA	20	0.0546152	0.00502513
V:19732037..19732062	-	GAATAAATCATTAGATTTTCTGACTC	11.0869	V:19732040..19732059	+	TCAGAAAATCTAATGATTTA	20	0.0546152	0.00492611
I:472305..472330	-	GGGGTCGTACATTGTGATTAGTGCTA	11.36	I:472308..472330	+	CACTAATCACAATGTACGACCCC	23	0.0546152	0.00480769
II:13478102..13478127	-	GAAGAACTTGGTTTGTTCCGCAGTAA	12.6161	II:13478105..13478122	+	CTGCGGAACAAACCAAGT	18	0.0546152	0.004329
IV:17220474..17220499	-	GGTCTGACCTTGTGCTTTGTGATAAG	14.7461	IV:17220477..17220497	+	ATCACAAAGCACAAGGTCAGA	21	0.0546152	0.0037037
I:11809570..11809595	+	GTCCAATGAACACATGGAATCGGTCC	16.5484	I:11809574..11809592	-	CCGATTCCATGTGTTCATT	19	0.0546152	0.00330033
IV:8598664..8598689	-	GTTGAAACTGTAAAAAATTAAACTTA	18.9515	IV:8598667..8598687	+	GTTTAATTTTTTACAGTTTCA	21	0.0546152	0.00288184
I:13410636..13410661	+	GCTTTTTGTTGGTAGTCATATTATGA	19.6615	I:13410640..13410658	-	TAATATGACTACCAACAAA	19	0.0546152	0.00277778
II:2681532..2681557	+	GACTCAAATGACCGTATGGAGTGTTC	20.6445	II:2681532..2681554	-	CACTCCATACGGTCATTTGAGTC	23	0.0546152	0.0026455
II:2503588..2503613	+	GGATGGTTAGGGACTAGGTCAGTAAT	21.573	II:2503590..2503610	-	ACTGACCTAGTCCCTAACCAT	21	0.0546152	0.00253165
I:2150194..2150219	+	GCCTCAAAATTTGATTGATTTCGTCA	26.3791	I:2150197..2150216	-	CGAAATCAATCAAATTTTGA	20	0.0546152	0.00207039
II:2502055..2502080	+	GAGGGAGGACATAGCTGGTGTTAATA	27.3076	II:2502057..2502077	-	TAACACCAGCTATGTCCTCCC	21	0.0546152	0.002
II:3373322..3373347	+	GATATTATGGTTTTGGATATTAGGAT	31.5676	II:3373326..3373344	-	CTAATATCCAAAACCATAA	19	0.0546152	0.0017301
II:1820248..1820273	+	GAAAATGCTTTTATTTAAAAAATGGT	31.7314	II:1820248..1820270	-	ATTTTTTAAATAAAAGCATTTTC	23	0.0546152	0.00172117
I:2150777..2150802	+	GATGTTGAATCTTGCTCGGCGAATTT	43.3098	I:2150779..2150799	-	TTCGCCGAGCAAGATTCAACA	21	0.0546152	0.00126103
V:19287489..19287514	+	GTCTCTGCAAGTTTTTTGATGTTTGA	83.2881	V:19287494..19287511	-	AACATCAAAAAACTTGCA	18	0.0546152	0.000655738
V:17073478..17073503	-	GTATGGTAGAACTGGAAAGTCGAGTT	184.818	V:17073481..17073503	+	TCGACTTTCCAGTTCTACCATAC	23	0.0546152	0.000295508
III:2429145..2429170	-	GAGATTGAGAATTATTTTGCGTAATT	3.5864	III:2429148..2429166	+	TACGCAAAATAATTCTCAA	19	0.0364101	0.0101523
X:1402735..1402760	-	GAGATTGAGAATTATTTTGCGTAATT	3.5864	X:1402738..1402756	+	TACGCAAAATAATTCTCAA	19	0.0364101	0.0101523
X:1648160..1648185	+	GAGATTGAGAATTATTTTGCGTAATT	3.5864	X:1648164..1648182	-	TACGCAAAATAATTCTCAA	19	0.0364101	0.0101523
IV:14937608..14937633	-	GTAGTTCAGAATTTTCGGATCCACAA	4.53306	IV:14937611..14937628	+	TGGATCCGAAAATTCTGA	18	0.0364101	0.00803213
IV:14936798..14936823	+	GTAGTTCAGAATTTTCGGATCCACAA	4.53306	IV:14936803..14936820	-	TGGATCCGAAAATTCTGA	18	0.0364101	0.00803213
III:2429278..2429303	-	GAATGGTGACTTGAATGGCAAGGAGA	5.15203	III:2429281..2429303	+	CCTTGCCATTCAAGTCACCATTC	23	0.0364101	0.00706714
X:1402867..1402892	-	GAATGGTGACTTGAATGGCAAGGAGA	5.15203	X:1402870..1402892	+	CCTTGCCATTCAAGTCACCATTC	23	0.0364101	0.00706714
X:1648028..1648053	+	GAATGGTGACTTGAATGGCAAGGAGA	5.15203	X:1648028..1648050	-	CCTTGCCATTCAAGTCACCATTC	23	0.0364101	0.00706714
X:1780492..1780517	-	GTTTGCAACAACTTTCAGATTGAGAG	1.065	X:1780495..1780516	+	TCAATCTGAAAGTTGTTGCAAA	22	0.0273076	0.025641
X:8144939..8144964	-	GTTTGCAACAACTTTCAGATTGAGAG	1.065	X:8144942..8144963	+	TCAATCTGAAAGTTGTTGCAAA	22	0.0273076	0.025641
III:2433665..2433690	-	GATTAGAAGCGGTCTAGATGTTATGT	1.72038	III:2433668..2433685	+	TAACATCTAGACCGCTTC	18	0.0273076	0.015873
III:2437618..2437643	+	GATTAGAAGCGGTCTAGATGTTATGT	1.72038	III:2437623..2437640	-	TAACATCTAGACCGCTTC	18	0.0273076	0.015873
III:2433771..2433796	-	GAGAATGAGAGAAGGTACTTTTGATG	1.85692	III:2433774..2433791	+	CAAAAGTACCTTCTCTCA	18	0.0273076	0.0147059
III:2437512..2437537	+	GAGAATGAGAGAAGGTACTTTTGATG	1.85692	III:2437517..2437534	-	CAAAAGTACCTTCTCTCA	18	0.0273076	0.0147059
III:2428609..2428634	-	GTTCACTTCCTCTTGTTTTCTTTTCA	2.56691	III:2428612..2428628	+	AAAGAAAACAAGAGGAA	17	0.0273076	0.0106383
III:2429301..2429326	-	GGAGACCAGACATGGTGGCACTTGAA	2.78537	III:2429304..2429326	+	AAGTGCCACCATGTCTGGTCTCC	23	0.0273076	0.00980392
X:1648005..1648030	+	GGAGACCAGACATGGTGGCACTTGAA	2.78537	X:1648005..1648027	-	AAGTGCCACCATGTCTGGTCTCC	23	0.0273076	0.00980392
V:18722282..18722307	+	GTAACTTCAAATGTTTTTACTGTCCA	4.15075	V:18722288..18722304	-	ACAGTAAAAACATTTGA	17	0.0273076	0.00657895
I:13411682..13411707	+	GAGCAAATTGTTTTATTGATAATTTG	4.80613	I:13411687..13411704	-	ATTATCAATAAAACAATT	18	0.0273076	0.00568182
IV:15646938..15646963	+	GAGCAAATTGTTTTATTGATAATTTG	4.80613	IV:15646943..15646960	-	ATTATCAATAAAACAATT	18	0.0273076	0.00568182
II:3306660..3306685	+	GACTCGAGAATTGCTTCGGCAGCTGC	5.89844	II:3306661..3306682	-	GCTGCCGAAGCAATTCTCGAGT	22	0.0273076	0.00462963
X:1025103..1025128	+	GACTCGAGAATTGCTTCGGCAGCTGC	5.89844	X:1025104..1025125	-	GCTGCCGAAGCAATTCTCGAGT	22	0.0273076	0.00462963
V:19731460..19731485	-	GCTTGATCAAAAATGTTTTCCCTGTC	6.28074	V:19731463..19731485	+	AGGGAAAACATTTTTGATCAAGC	23	0.0273076	0.00434783
X:16329501..16329526	-	GCTTGATCAAAAATGTTTTCCCTGTC	6.28074	X:16329504..16329526	+	AGGGAAAACATTTTTGATCAAGC	23	0.0273076	0.00434783
II:13473833..13473858	-	GAGAGCTAGAACATTTTATTTTCAGA	7.80997	II:13473836..13473854	+	GAAAATAAAATGTTCTAGC	19	0.0273076	0.0034965
II:15127161..15127186	-	GTTACTTATGAGTTTATTATTGGAAG	6.24433	II:15127164..15127182	+	CCAATAATAAACTCATAAG	19	0.0182051	0.00291545
IV:17220760..17220785	-	GTTACTTATGAGTTTATTATTGGAAG	6.24433	IV:17220763..17220781	+	CCAATAATAAACTCATAAG	19	0.0182051	0.00291545
X:1405186..1405211	-	GTTACTTATGAGTTTATTATTGGAAG	6.24433	X:1405189..1405207	+	CCAATAATAAACTCATAAG	19	0.0182051	0.00291545
IV:17220572..17220597	-	GCGTAACCAGATGACATGTTACTAGG	11.7969	IV:17220575..17220596	+	AGTAACATGTCATCTGGTTACG	22	0.0182051	0.00154321
X:1404998..1405023	-	GCGTAACCAGATGACATGTTACTAGG	11.7969	X:1405001..1405022	+	AGTAACATGTCATCTGGTTACG	22	0.0182051	0.00154321
X:16952088..16952113	+	GAATCATCAAAGAGGTTTCATACAGC	1.58384	X:16952091..16952110	-	GTATGAAACCTCTTTGATGA	20	0.0136538	0.00862069
V:20382358..20382383	-	GATCATAAATACAATACACTGAAGAG	1.20153	V:20382361..20382381	+	TTCAGTGTATTGTATTTATGA	21	0.00303418	0.00252525
